# Supplementary material for: Topological Structure Optimization of B,N-Doped Nanographenes for Deep-Blue Emitters
Source: Research Square preprint supplement (doi:10.21203/rs.3.rs-4346848/v1), 2024-05-21
Supplement: Supplementary file 1 [file d65a350c1b4389748b4946ca.docx]

**Supplementary Information**

**Topological Structure Optimization of B,N-Doped Nanographenes for Deep-Blue Emitters**

Xiaosong Cao1, Xingyu Huang1, Jingsheng Miao1, Hongli Sun2, Chenliang Su2, Like Sun2, Yanglong Liao2, Zhi Chen3, Cheng Zhong4, Hong Lin1, Xialei Lv1, Nengquan Li1, Zhongyan Huang1, Zhan-Xiang Chen1, Tao Hua1, Xiaojun Yin1, Yang Zou1, Chuluo Yang1*

1 Shenzhen Key Laboratory of New Information Display and Storage Materials, College of Materials Science and Engineering, Shenzhen University, Shenzhen 518060, China

2 International Collaboration Laboratory of 2D Materials for Optoelectronics Science and Technology of Ministry of Education, Institute of Microscale Optoelectronics, Shenzhen University, Shenzhen 518060, China

3 College of Chemistry and Environmental Engineering, Shenzhen University, Shenzhen 518060, China

4 Hubei Key Lab on Organic and Polymeric Optoelectronic Materials, Department of Chemistry, Wuhan University, Wuhan 430072, China

*Corresponding Author(s): clyang@szu.edu.cn (Chuluo Yang)

**Table of Contents**

1. Experimental Section S3

1.1. Materials and Methods S3

1.2. Synthesis S3

1.3. Thermal and Electrochemical Characterization S9

1.4. Single Crystal X-ray Crystallography S9

1.5. Film Preparation and Scanning Tunnelling Microscopy (STM) S10

1.6. Quantum Chemical Calculations S10

1.7. Photophysical Characterization S10

1.8. Analysis of Rate Constants S11

1.9. Determination of Emitting Dipole Orientation S11

1.10. Device Fabrication and Measurement S12

2. Schemes, Figures and Tables S13

3. References S80

**1. Experimental Section**

- 1. **Materials and Methods**

All reagents and solvents were purchased from commercial sources and used without further purification. All reactions were performed under argon conditions using anhydrous solvents and heated by metal sand bath (WATTCAS, LAB-500, https://www.wattcas.com). The final products were first purified by column chromatography, and then further refined by multiple recrystallizations. 1H NMR (500 MHz), 13C NMR (125 MHz) spectra were recorded on Bruker AV 500 NMR instrument at ambient temperature using deuterated solvents. Chemical shifts were given parts per million (ppm) relative to tetramethyl silane (*δ* = 0 ppm). The high resolution mass spectrometry (HR-MS) for the compounds was conducted on a Thermo Scientific LTQ Orbitrap XL with ESI ion source. Elemental analysis was performed on a Vario EL cube elemental analyzer.

**1.2. Synthesis**

***Synthesis of N1,N3-diphenylbenzene-1,3-diamine*** (**1-1**): A mixture of 1,3-dibromobenzene (14.16 g, 60.00 mmol), aniline (16.76 g, 180.00 mmol), Pd(OAc)2 (0.34 g, 1.50 mmol), DPPF (3.32 g, 6.00 mmol) and NaO*t*Bu (17.28 g, 180.00 mmol) in toluene (100 mL) was stirred at 110ºC for 24 h under argon atmosphere. After cooling to room temperature, the mixture was filtered with dichloromethane and then the solvent was removed under vacuum. The crude product was washed by petroleum ether, then dried by vacuum to give the intermediate **1-1** as a black solid (14.68 g, 94%). 1H NMR (500 MHz, CDCl3): δ (ppm) 7.28 (s, 2H), 7.25 (s, 2H), 7.14 (t, *J* = 7.9 Hz, 1H), 7.08 (d, *J* = 7.7 Hz, 4H), 6.93 (t, *J* = 7.1 Hz, 2H), 6.76 (s, 1H), 6.63 (d, *J* = 7.5 Hz, 2H), 5.67 (s, 2H). 13C NMR (125 MHz, CDCl3): δ (ppm) 144.39, 142.92, 130.18, 129.33, 121.15, 118.29, 110.27, 106.35.

***Synthesis of 2,4,6-trimethyl-N-phenylaniline*** (**1-2**): A mixture of bromobenzene (12.56 g, 80.00 mmol), 2,4,6-trimethylaniline (10.80 g, 80.00 mmol), Pd(OAc)2 (0.34 g, 1.50 mmol), *t*Bu3PHBF4 ( 3.48 g, 12.00 mmol) and NaO*t*Bu (23.08 g, 240.00 mmol) in toluene (100 mL) was stirred at 110ºC for 18 h under argon atmosphere. After cooling to room temperature, the crude product was removed under vacuum and then purified by silica gel chromatography using petroleum ether/dichloromethane (8/1, *v*/*v*) as eluent to give the intermediate **1-2** as a yellow oil liquid (14.24 g, 84%). 1H NMR (500 MHz, CDCl3): δ (ppm) 7.18-7.15 (m, 2H), 6.97 (s, 2H), 6.75 (t, *J* = 7.3 Hz, 1H), 6.51 (d, *J* = 7.6 Hz, 2H), 5.11 (s, 1H), 2.33 (s, 3H), 2.20 (s, 6H). 13C NMR (125 MHz, CDCl3): δ (ppm) 146.78, 136.08, 135.64, 135.50, 129.34, 129.33, 117.98, 113.38, 21.04, 18.37.

***Synthesis of 5-chloro-N1,N3-dimesityl-N1,N3-diphenylbenzene-1,3-diamine*** (**1-3**): A mixture of 1,3-dibromo-5-chlorobenzene (10.80 g, 40.00 mmol), **1-2** (17.80 g, 84.00 mmol), Pd(OAc)2 (0.34 g, 1.50 mmol), *t*Bu3PHBF4 ( 1.74 g, 6.00 mmol) and NaO*t*Bu (11.50 g, 120.00 mmol) in toluene (100 mL) was stirred at 110 ºC for 18 h under argon atmosphere. After cooling to room temperature, the crude product was removed under vacuum and then purified by silica gel chromatography using petroleum ether/dichloromethane (8/1, *v*/*v*) as eluent to give the intermediate **1-3** as a white solid (17.00 g, 80%). 1H NMR (500 MHz, CDCl3): *δ* (ppm) 7.14 (t, *J* = 7.9 Hz, 4H), 6.92 (d, *J* = 8.1 Hz, 4H), 6.88 (s, 4H), 6.84 (t, *J* = 7.3 Hz, 2H), 6.64 (t, *J* = 1.8 Hz, 1H), 6.29 (d, *J* = 1.9 Hz, 2H), 2.30 (s, 6H), 1.96 (s, 12H). 13C NMR (125 MHz, CDCl3): δ (ppm) 147.77, 145.43, 139.60, 137.44, 137.03, 135.49, 130.02, 129.09, 120.03, 111.66, 108.63, 21.15, 18.50.

***Synthesis of N1,N1'-(1,3-phenylene)bis(N3,N5-dimesityl-N1,N3,N5-triphenylbenzene-1,3,5-triamine)* (1-4):** A mixture of **1-3** (11.15 g, 21.00 mmol), **1-1** (2.60 g, 10.00 mmol), Pd2(dba)3 (0.28 g, 0.30 mmol), *t*Bu3PHBF4 ( 0.44 g, 1.50 mmol) and NaO*t*Bu (2.80 g, 9.00 mmol) in *o*-xylene (50 mL) was stirred at 120ºC for 24 h under argon atmosphere. After cooling to room temperature, the crude product was removed under vacuum and then purified by silica gel chromatography using petroleum ether/dichloromethane (7/1, *v*/*v*) as eluent to give the intermediate **1-4** as a white solid (8.15 g, 65%). 1H NMR (500 MHz, CDCl3): δ (ppm) 7.09 (t, *J* = 7.8 Hz, 4H), 7.02 (t, *J* = 7.9 Hz, 8H), 6.93 (t, *J* = 8.0 Hz, 1H), 6.87 (dd, *J* = 13.8, 7.5 Hz, 6H), 6.80 (d, *J* = 8.0 Hz, 8H), 6.76 (s, 9H), 6.72 (t, *J* = 7.3 Hz, 4H), 6.55 (dd, *J* = 8.0, 2.0 Hz, 2H), 6.26-6.20 (m, 4H), 6.15 (s, 2H), 2.23 (s, 12H), 1.87 (s, 24H). 13C NMR (125 MHz, CDCl3): δ (ppm) 148.59, 148.15, 147.53, 147.02, 145.83, 139.91, 137.35, 136.48, 129.75, 128.92, 128.80, 123.51, 122.02, 120.20, 118.93, 118.07, 109.49, 107.19, 21.10, 18.42.

***Synthesis of QB-U*:** **1-4** (0.50 g, 0.4 mmol) was dissolved in 1,2-dichlorobenzene (15 mL), and then BBr3 (2.22 mL, 22.40 mmol) was carefully added at room temperature under argon atmosphere. The reaction mixture was heated to 220oC for 60 h. After cooling to room temperature, 50 mL ethanol was added. The crude product was removed under vacuum and then purified by silica gel chromatography using petroleum ether/dichloromethane (4/1, *v*/*v*) as eluent to give the corresponding product **QB-U** as a yellow-green solid (0.22 g, 43%). 1H NMR (500 MHz, CD2Cl2): δ (ppm) 10.18 (s, 1H), 9.37 (dd, *J* = 6.8, 2.3 Hz, 2H), 8.83 (ddd, *J* = 19.8, 7.7, 1.7 Hz, 4H), 8.62-8.58 (m, 3H), 7.95-7.89 (m, 2H), 7.59-7.53 (m, 6H), 7.47-7.43 (ddd, *J* = 8.6, 7.0, 1.7 Hz, 2H), 7.31 (t, *J* = 7.4 Hz, 2H), 6.97 (s, 2H), 6.92 (s, 4H), 6.87 (s, 2H), 6.84-6.81 (m, 2H), 6.77 (d, *J* = 8.5 Hz, 2H), 5.26 (s, 2H), 2.40 (s, 12H), 1.70 (s, 6H), 1.69 (s, 6H), 1.56 (s, 12H). 13C NMR (125 MHz, CS2:CD2Cl2 = 1:3): δ (ppm) 148.83, 148.76, 148.49, 147.78, 146.59, 146.44, 143.53, 138.65, 137.28, 136.96, 136.86, 136.69, 136.67, 136.66, 135.85, 135.65, 135.12, 132.27, 132.17, 130.36, 130.26, 130.06, 130.05, 124.27, 123.97, 121.34, 121.11, 119.49, 116.25, 116.05, 112.24, 90.81, 21.68, 17.49, 17.41, 17.33. HRMS: (ESI) m/z calcd for C90H72B4N6 [M+]: 1280.8480; Found: 1281.6277. Elemental analysis: Calc. for C90H72B4N6: C, 84.40%; H, 5.67%; N, 6.56%; found: C, 84.23%; H, 5.87%; N, 6.64%.

***Synthesis of 3-bromo-5-chloro-N,N-diphenylaniline* (2-1):** A mixture of 1,3-dibromo-5-chlorobenzene (10.80 g, 40.00 mmol), diphenylamine (6.10 g, 36.00 mmol), Pd2(dba)3 (0.37 g, 0.40 mmol), DPPF ( 3.32 g, 6.00 mmol) and NaO*t*Bu (7.68 g, 80.00 mmol) in toluene (70 mL) was stirred at 110ºC for 18 h under argon atmosphere. After cooling to room temperature, the crude product was removed under vacuum and then purified by silica gel chromatography using petroleum ether/dichloromethane (8/1, *v*/*v*) as eluent to give the intermediate **2-1** as a white solid (8.03 g, 56%). 1H NMR (500 MHz, CDCl3): δ (ppm) 7.31 (td, *J* = 7.5, 1.8 Hz, 4H), 7.13-7.08 (m, 6H), 7.04 (t, *J* = 1.7 Hz, 1H), 7.02 (t, *J* = 1.8 Hz, 1H), 6.90 (d, *J* = 1.9 Hz, 1H). 13C NMR (125 MHz, CDCl3): *δ* (ppm) 150.24, 146.61, 135.54, 129.81, 125.51, 124.53, 124.10, 120.47.

***Synthesis of 5-chloro-N1-mesityl-N1,N3,N3-triphenylbenzene-1,3-diamine* (2-2):** A mixture of **2-1** (8.61 g, 24.00 mmol), **1-2** (5.58 g, 26.40 mmol), Pd(OAc)2 (0.27 g, 1.20 mmol), *t*Bu3PHBF4 (1.05 g, 3.60 mmol) and NaO*t*Bu (5.76 g, 60.00 mmol) in toluene (50 mL) was stirred at 110ºC for 18 h under argon atmosphere. After cooling to room temperature, the crude product was removed under vacuum and then purified by silica gel chromatography using petroleum ether/dichloromethane (8/1, *v*/*v*) as eluent to give the intermediate **2-2** as a white solid (7.71 g, 66%). 1H NMR (500 MHz, CDCl3): δ (ppm) 7.26-7.21 (m, 4H), 7.14-7.10 (m, 2H), 7.09-7.05 (m, 4H), 7.01 (t, *J* = 7.4 Hz, 2H), 6.89 (d, *J* = 7.8 Hz, 4H), 6.84 (t, *J* = 7.3 Hz, 1H), 6.64 (t, *J* = 2.0 Hz, 1H), 6.51 (t, *J* = 1.9 Hz, 1H), 6.38 (t, *J* = 1.9 Hz, 1H), 2.31 (s, 3H), 1.99 (s, 6H). 13C NMR (125 MHz, CDCl3): *δ* (ppm) 149.44, 147.90, 147.20, 145.26, 139.47, 137.42, 137.15, 135.36, 130.10, 129.34, 129.10, 124.65, 123.33, 121.47, 120.14, 115.40, 113.07, 112.42, 21.15, 18.60.

***Synthesis of N1,N3-dimesityl-N1,N5,N5-triphenylbenzene-1,3,5-triamine* (2-3):** A mixture of **2-1** (7.34 g, 15.00 mmol), 2,4,6-trimethylaniline (2.55 g, 18.00 mmol), Pd2(dba)3 (0.37 g, 0.40 mmol), *t*Bu3PHBF4 (0.66 g, 2.25 mmol) and NaO*t*Bu (4.32 g, 45.00 mmol) in toluene (40 mL) was stirred at 110ºC for 18 h under argon atmosphere. After cooling to room temperature, the crude product was removed under vacuum and then purified by silica gel chromatography using petroleum ether/dichloromethane (8/1, *v*/*v*) as eluent to give the intermediate **2-3** as a white solid (7.95 g, 90%). 1H NMR (500 MHz, CDCl3): δ (ppm) 7.16 (t, *J* = 7.9 Hz, 4H), 7.07-7.01 (m, 6H), 6.91 (t, *J* = 7.3 Hz, 2H), 6.85 (t, *J* = 3.8 Hz, 4H), 6.75 (d, *J* = 6.6 Hz, 3H), 6.22 (t, *J* = 1.8 Hz, 1H), 5.71-5.67 (m, 2H), 4.86 (s, 1H), 2.29 (s, 3H), 2.20 (s, 3H), 2.06 (s, 6H), 1.96 (s, 6H). 13C NMR (125 MHz, CDCl3): δ (ppm) 149.01, 148.39, 147.78, 147.49, 146.02, 140.26, 137.60, 136.47, 135.57, 135.45, 135.00, 129.79, 129.07, 128.91, 128.83, 123.76, 122.10, 120.20, 119.38, 107.47, 103.14, 100.91, 21.13, 20.93, 18.59, 18.29.

***Synthesis of N1,N3-dimesityl-N1,N3,N5-triphenylbenzene-1,3,5-triamine* (2-4):** A mixture of **1-3** (10.60 g, 20.00 mmol), aniline (2.40 g, 24.00 mmol), Pd2(dba)3 (0.37 g, 0.40 mmol), *t*Bu3PHBF4 (0.88 g, 3.00 mmol) and NaO*t*Bu (5.76 g, 60.00 mmol) in toluene (50 mL) was stirred at 110ºC for 18 h under argon atmosphere. After cooling to room temperature, the crude product was removed under vacuum and then purified by silica gel chromatography using petroleum ether/dichloromethane (7/1, *v*/*v*) as eluent to give the intermediate **2-4** as a white solid (7.60 g, 65%). 1H NMR (500 MHz, CDCl3): δ (ppm) 7.12 (ddd, *J* = 20.2, 8.5, 7.4 Hz, 6H), 6.98-6.93 (m, 4H), 6.88 (s, 4H), 6.84-6.76 (m, 5H), 6.50 (t, *J* = 1.9 Hz, 1H), 6.07 (d, *J* = 2.0 Hz, 2H), 5.49 (s, 1H), 2.30 (s, 6H), 1.99 (s, 12H). 13C NMR (125 MHz, CDCl3): δ (ppm) 147.52, 143.90, 143.37, 140.18, 137.57, 136.63, 129.87, 129.16, 128.95, 120.49, 120.18, 119.58, 116.70, 105.14, 102.84, 21.14, 18.54.

***Synthesis of N1-(3-bromophenyl)-N3,N5-dimesityl-N1,N3,N5-triphenylbenzene-1,3,5-triamine* (2-5):** A mixture of **2-4** (10.60 g, 18.00 mmol), 1,3-dibromobenzene (4.80 g, 20.00 mmol), Pd2(dba)3 (0.37 g, 0.40 mmol), DPPF (1.68 g, 3.00 mmol) and NaO*t*Bu (3.84 g, 40.00 mmol) in toluene (50 mL) was stirred at 110 ºC for 18 h under argon atmosphere. After cooling to room temperature, the crude product was removed under vacuum and then purified by silica gel chromatography using petroleum ether/dichloromethane (7/1, *v*/*v*) as eluent to give the intermediate **2-5** as a white solid (8.40 g, 63%). 1H NMR (500 MHz, CDCl3): δ (ppm) 7.21-7.14 (m, 3H), 7.10-7.04 (m, 4H), 7.02 (d, *J* = 7.6 Hz, 2H), 6.99-6.94 (m, 3H), 6.91-6.86 (m, 1H), 6.83 (d, J = 7.9 Hz, 4H), 6.77 (d, *J* = 16.0 Hz, 6H), 6.20 (d, *J* = 1.9 Hz, 2H), 6.13 (t, *J* = 1.8 Hz, 1H), 2.26 (s, 6H), 1.89 (s, 12H). 13C NMR (125 MHz, CDCl3): δ (ppm) 149.08, 148.19, 147.31, 146.86, 145.69, 139.80, 137.32, 136.62, 130.08, 129.76, 129.20, 128.94, 125.26, 124.61, 124.43, 123.32, 122.59, 120.91, 120.42, 119.07, 109.25, 107.36, 21.10, 18.38.

***Synthesis of N1-(3-((3,5-bis(mesityl(phenyl)amino)phenyl)(phenyl)amino)phenyl)-N1,N3-dimesityl-N3,N5,N5-triphenylbenzene-1,3,5-triamine* (2-6):** A mixture of **2-5** (7.44 g, 10.00 mmol), **2-3** (6.48 g, 11.00 mmol), Pd(OAc)2 (0.12 g, 0.5 mmol), *t*Bu3PHBF4 (0.44 g, 1.50 mmol) and NaO*t*Bu (2.40 g, 25.00 mmol) in toluene (50 mL) was stirred at 110ºC for 18 h under argon atmosphere. After cooling to room temperature, the crude product was removed under vacuum and then purified by silica gel chromatography using petroleum ether/dichloromethane (3/1, *v*/*v*) as eluent to give the intermediate **2-6** as a white solid (8.00 g, 64%). 1H NMR (500 MHz, CDCl3): δ (ppm) 7.14-7.10 (m, 4H), 7.06-6.99 (m, 8H), 6.99-6.95 (m, 4H), 6.89-6.83 (m, 5H), 6.80-6.69 (m, 18H), 6.60 (t, *J* = 2.0 Hz, 1H), 6.45-6.37 (m, 2H), 6.23 (t, *J* = 1.8 Hz, 1H), 6.19 (d, *J* = 2.0 Hz, 2H), 6.17 (t, *J* = 1.8 Hz, 1H), 6.12 (t, *J* = 1.9 Hz, 1H), 5.97 (t, *J* = 1.9 Hz, 1H), 2.23-2.22 (m, 12H), 1.85 and 1.83 (s and s, 18H), 1.77 (s, 6H). 13C NMR (125 MHz, CDCl3): *δ* (ppm) 148.64, 148.61, 148.04, 147.57, 147.51, 147.10, 147.04, 146.94, 146.60, 145.80, 145.72, 139.98, 139.92, 139.82, 137.34, 137.33, 137.06, 136.44, 136.20, 129.73, 129.65, 129.59, 128.95, 128.88, 128.69, 123.65, 122.26, 122.22, 121.35, 120.20, 120.18, 119.00, 118.87, 116.83, 115.06, 113.72, 109.70, 109.40, 109.37, 107.24, 107.19, 21.10, 21.09, 18.41, 18.36, 18.35.

***Synthesis of QB-J*:** **2-6** (0.50 g, 0.4 mmol) was dissolved in 1,2-dichlorobenzene (15 mL), and then BBr3 (2.22 mL, 22.40 mmol) was carefully added at room temperature under argon atmosphere. The reaction mixture was heated to 220oC for 2 days. After cooling to room temperature, 50 mL ethanol was added. The crude product was removed under vacuum and then purified by silica gel chromatography using petroleum ether/dichloromethane (4/1, *v*/*v*) as eluent to give the corresponding product **QB-J** as an orange-yellow solid (0.12 g, 24%). 1H NMR (500 MHz, CD2Cl2): δ (ppm) 10.51 and 10.43 (s and s, 1H), 9.44-9.42 and 9.23-9.21 (m and m, 1H), 9.39 and 8.99 (dd and m, *J* = 7.6 Hz, *J* = 1.7 Hz, 1H), 8.98-8.95 (m, 1H), 8.92-8.82 (m, 2H), 8.75-8.67 (m, 1H), 8.41-8.27 (m, 2H), 8.21-8.18 (m, 1H), 7.79-7.29 (m, 13H), 7.10-6.73 (m, 11H), 5.36 and 5.35 (s and s, 1H), 5.30 and 5.29 (s and s, 1H), 2.44-2.40 (m, 12H), 2.05 and 2.01 (s and s, 3H), 1.77-1.56 (m, 19H), 1.49 (s, 2H). 13C NMR (125 MHz, CS2:CD2Cl2 = 1:3): δ (ppm) 138.79, 138.68, 137.32, 137.24, 136.91, 136.87, 136.70, 136.44, 136.39, 135.82, 135.54, 135.38, 135.09, 135.03, 134.73, 134.66, 132.15, 130.49, 130.38, 130.28, 130.09, 130.05, 129.49, 129.37, 128.94, 124.50, 123.98, 123.58, 121.23, 116.27, 116.22, 116.08, 21.68, 21.65, 17.47, 17.37. HRMS: (ESI) m/z calcd for C90H72B4N6 [M+]: 1280.8480; found: 1281.6280. Elemental analysis: Calc. for C90H72B4N6: C, 84.40%; H, 5.67%; N, 6.56%; found: C, 84.38%; H, 5.70%; N, 6.51%.

***Synthesis of N1,N3-dimesitylbenzene-1,3-diamine*** (**3-1**): A mixture of 1,3-dibromobenzene (3.54 g, 15.00 mmol), 2,4,6-trimethylaniline (4.26 g, 31.50 mmol), Pd(OAc)2 (0.17 g, 0.75 mmol), *t*Bu3PHBF4 (0.65 g, 2.25 mmol) and NaO*t*Bu (5.77 g, 60.00 mmol) in toluene (50 mL) was stirred at 110ºC for 18 h under argon atmosphere. After cooling to room temperature, the mixture was filtered with dichloromethane and then the solvent was removed under vacuum. The crude product was washed by petroleum ether, then dried by vacuum to give the intermediate **3-1** as a grey solid (4.02 g, 78%). 1H NMR (500 MHz, CDCl3): δ (ppm) 6.91 (d, *J* = 15.3 Hz, 5H), 5.86 (dd, *J* = 8.0, 2.2 Hz, 2H), 5.71 (t, *J* = 2.1 Hz, 1H), 4.96 (s, 2H), 2.30 (s, 6H), 2.19 (s, 12H). 13C NMR (125 MHz, CDCl3): δ (ppm) 147.93, 136.07, 136.00, 135.24, 129.91, 129.19, 103.85, 98.78, 21.03, 18.43.

***Synthesis of N1,N1'-(1,3-phenylene)bis(N1,N3-dimesityl-N3,N5,N5-triphenylbenzene-1,3,5-triamine)*** (**3-2**): A mixture of **2-2** (6.16 g, 12.60 mmol), **3-1** (2.06 g, 6.00 mmol), Pd2(dba)3 (0.28 g, 0.30 mmol), *t*Bu3PHBF4 (0.27 g, 0.90 mmol) and NaO*t*Bu (1.73 g, 18.00 mmol) in *o*-xylene (40 mL) was stirred at 120ºC for 24 h under argon atmosphere. After cooling to room temperature, the crude product was removed under vacuum and then purified by silica gel chromatography using petroleum ether/dichloromethane (3/1, *v*/*v*) as eluent to give the intermediate **3-2** as a white solid (4.30 g, 57%). 1H NMR (500 MHz, CDCl3): δ (ppm) 7.12 (t, *J* = 7.9 Hz, 7H), 7.03 (d, *J* = 8.2 Hz, 4H), 6.96 (d, *J* = 7.7 Hz, 8H), 6.87 (t, *J* = 7.3 Hz, 4H), 6.74 (td, *J* = 15.2, 14.5, 7.4 Hz, 12H), 6.64 (s, 4H), 6.35 (s, 1H), 6.27-6.23 (m, 4H), 6.20 (s, 2H), 5.99 (t, *J* = 1.7 Hz, 2H), 2.25 (s, 6H), 2.20 (s, 6H), 1.85 (s, 12H), 1.72 (s, 12H). 13C NMR (125 MHz, CDCl3): δ (ppm) 148.48, 147.58, 147.05, 146.92, 146.22, 145.86, 140.06, 139.92, 137.32, 137.01, 136.38, 136.02, 129.65, 129.40, 128.93, 128.88, 123.55, 122.13, 120.04, 118.74, 111.28, 109.53, 109.46, 107.40, 21.09, 21.06, 18.40, 18.18.

***Synthesis of QB-I*:** **3-2** (0.50 g, 0.4 mmol) was dissolved in 1,2-dichlorobenzene (15 mL), and then BBr3 (2.22 mL, 22.40 mmol) was carefully added at room temperature under argon atmosphere. The reaction mixture was heated to 220oC for 2 days. After cooling to room temperature, 50 mL ethanol was added. The crude product was removed under vacuum and then purified by silica gel chromatography using petroleum ether/dichloromethane (4/1, *v*/*v*) as eluent to give the corresponding product **QB-I** as a yellow solid (0.09 g, 17%). 1H NMR (500 MHz, CD2Cl2): δ (ppm) 10.51 and 10.46 (s and s,1H), 9.39 and 9.05 (d and d, *J* = 7.2 Hz and *J* = 7.2 Hz, 2H), 8.95 (d, *J* = 7.2 Hz, 2H), 8.84 (t, *J* = 8.0 Hz, 2H), 8.36-8.28 (m, 4H), 7.77-7.45 (m, 10H), 7.36 (t, *J* = 7.2 Hz, 2H), 6.90-6.80 (m, 6H), 6.74-6.62 (m, 4H), 5.96 (d, *J* = 4.4 Hz, 1H), 5.26 (s, 2H), 2.35 and 2.34 (s and s, 12H), 1.69-1.55 (m, 18H), 1.48 and 1.46 (s and s, 6H). 13C NMR (125 MHz, CS2:CD2Cl2 = 1:3): δ (ppm) 147.44, 146.29, 138.66, 138.05, 137.19, 136.87, 136.67, 136.53, 136.25, 136.21, 136.18, 135.60, 135.57, 135.46, 135.39, 135.08, 135.05, 135.01, 132.08, 130.29, 130.03, 129.65, 129.49, 129.46, 129.40, 129.31, 124.50, 124.47, 124.38, 124.30, 124.17, 123.92, 121.18, 121.13, 116.15, 100.88, 21.61, 21.58, 17.43, 17.37, 17.25, 17.15, 17.10. HRMS: (ESI) m/z calcd for C90H72B4N6 [M+]: 1280.8480; Found: 1281.6273. Elemental analysis: Calc. for C90H72B4N6: C, 84.40%; H, 5.67%; N, 6.56%; found: C, 84.22%; H, 5.60%; N, 6.65%.

- 1. **Thermal and Electrochemical Characterization**

Thermogravimetric analysis (TGA) was undertaken using TGA-Q50 Instrument (TA Instrument, American) at a heating of 10°C min-1 from 30°C to 800°C under nitrogen flushing. The thermal decomposition temperature (*T*d) was determined by the recorded temperature at 5% weight loss. Differential scanning calorimetry (DSC) was performed at a heating of 10°C min-1 from 30°C to 380°C using a TA DSC-Q200 (TA Instrument, American) under nitrogen condition, and *T*g was determined from the second heating scan. Cyclic voltammetry (CV) measurements were carried out on a CHI600 electrochemical analyzer (Chenhua, China) at room temperature, with a conventional three-electrode system consisting of a glassy carbon working electrode, a platinum wire auxiliary electrode, and an Ag/AgCl standard electrode using as the reference electrode. The supporting electrolyte was 0.1 M tetrabutylammonium hexafluorophosphate (*t*Bu4NPF6) in anhydrous dichloromethane solution, and ferrocene was added as a calibrant in the whole measurement. The HOMO energy levels of the compounds were calculated according to the formula: *E*HOMO (eV) = -[4.8 + (*E*1/2(ox/red) - *E*1/2(Fc+/Fc))] eV. The LUMO energy levels of the compounds were deduced from the HOMO levels and the UV-vis absorption onsets of the longer wavelength.

**1.4. Single Crystal X-ray Crystallographic Data**

The single crystals of **QB-U** was cultured from chlorobenzene by slow solvent evaporation and then subjected to crystallography analysis. X-ray single crystal data was collected on a Bruker D8 Venture diffractometer using CuK radiation (λ = 1.54178) source. The selected crystal was kept at 150.0 K during data collection. Using Olex21, the structure was solved with the ShelXT2 structure solution program using Intrinsic Phasing and refined with the ShelXL3 refinement package using least-squares minimization. Selected crystal data and experimental details are listed below. All crystallographic information in CIF format have been deposited at the Cambridge Crystallographic Data Center (CCDC) under deposition number 2348230 for **QB-U** via [www.ccdc.cam.ac.uk/data_request/cif](http://www.ccdc.cam.ac.uk/data_request/cif).

**1.5. Film Preparation and Scanning Tunnelling Microscopy (STM)**

Au(111)/Mica substrate that for the deposition of molecules was first cleaned by multiple cycles of Ar+ sputtering and annealing. Then the molecules were thermally deposited on the clean surface of Au(111)/Mica substrate in Knudsen cell. After deposition of molecules, STM characterizations were conducted in non-contact LT-STM/AFM system operated under ultrahigh vacuum (base pressure, P < 2 × 10−11 mbar) at a temperature of T = 4.5K (SPECS), with the electrochemically etched W as the scanning tip.

**1.6. Quantum Chemical Calculations**

Theoretical chemical calculations were performed by the Gaussian 16 program package. Density functional theory (DFT) were performed at the B3LYP-D3(BJ)/6-31G(d,p) level of theory to attain the optimized molecular geometries for the S0 and S1 state. The HOMO and LUMO were obtained on the basis of the optimized geometric configurations at optimized S0 geometry. Time-dependent DFT (TD-DFT) calculations were carried out by the same method using the optimized S1 geometry. Additionally, the spin-orbit coupling (SOC) matrix element values between S1 and Tn (n = 1, 2, 3) states were computed using PySOC by considering that the three Tn substrates (m = 1, 0, -1) are degenerate, *i.e.*,, where The represents the interaction of the SOC. For a more precise determination of singlet and triplet energy levels, the mPW2PLYP/def2SVP level of theory was applied using the ORCA 5.0 computational package.4 The electronic spatial extent is mathematically defined as , where the *r* refers to the distance between the electron coordinates and the origin, the *x*, *y*, and *z* are the three Cartesian components of the electron coordinate vector (**r**), and *ρ*(**r**) is the probability density for a specific orbital.

**1.7. Photophysical Characterization**

The UV-vis absorption spectra were obtained on a Shimadzu UV-2600 spectrophotometer (Shimadzu, Japan) at room temperature with a concentration of 2×10-6 M. Phosphorescence spectra were measured on a Hitachi F-7100 fluorescence spectrophotometer at 77 K. The transient photoluminescence (PL) decay curves were obtained by FluoTime 300 (PicoQuant GmbH) with a Picosecond Pulsed UV-LASTER (LASTER375) as the excitation source. The solid-state PL quantum efficiencies (*Φ*PLs) were measured on a Hamamatsu UV-NIR absolute PL quantum yield spectrometer (C13534, Hamamatsu Photonics) equipped with an integrating sphere. The integrating sphere was purged with dry argon to maintain an inert atmosphere and all the samples were excited at 370 nm. Nanosecond time-resolved transient absorption spectra and decay kinetics were measured on LFP instrument (LP 980, Edinburgh Instruments Ltd). The pump laser beam and the probe beam crossed perpendicularly through the liquid sample in a quartz cuvette (10 mm × 10 mm). A dynamic decay curve was recorded with a digital phosphor oscilloscope (TDS 3012C, Tektronix Inc.).

**1.8. Analysis of Rate Constants**

The rate constants of radiative decay (*k*r) and nonradiative decay (*k*nr) from S1 to S0 states, the rate constants of intersystem crossing (*k*ISC) and reverse intersystem crossing (*k*RISC) could be estimated using the following equations.5-7

…………………………………………………..Eq.(1)

…………………………………………………………………Eq.(2)

………………………………………………………….Eq.(3)

…………………………………………………Eq.(4)

Where *k*p and *k*d represent the decay rate constants for prompt and delayed fluorescence, respectively, which are in reciprocal relationship with the decay time constants (*τ*p and *τ*d) experimentally determined from transient PL characteristics. *Φ*p and *Φ*d indicate prompt and delayed fluorescence components and can be distinguished from the total *Φ*PL by comparing the integrated intensities of prompt (*r*p) and delayed components (*r*d) in the transient PL spectra. *r*p and *r*d were determined using *τ*p and *τ*d and fitting parameter (*A*p, *A*d) as follows.

…………………………………………………….Eq.(5)

…………………………………………………Eq.(6)

…………………………………………………Eq.(7)

**1.9. Determination of Emitting Dipole Orientation**

The emitting dipole orientation of an emitting film was measured by angle-resolved and polarization-resolved PL measurements in a Hamamatsu’s established molecular orientation measurement system (C13472-01, Hamamatsu Photonics). The samples were attached to a fused silica half-cylinder prism by index matching liquid. The excitation of the samples was performed with the 360-nm line of the continuous-wave laser with a fixed excitation angle of 45°. The angle-dependent p-polarized emission intensity at the peak wavelength of the PL spectrum of the emitting layer was detected. The horizontal dipole orientation (Θ//) was then determined by least-square fitting of the measured angle-dependent p-polarized emission intensity with calculated results.

**1.10. Device Fabrication and Measurement**

The ITO coated glass substrates were successively ultrasonicated with acetone/ethanol and dried with nitrogen gas flow, followed by 5 min oxygen-plasma treatment. Then the sample was transferred to the deposition system. Both 8-hydroxyquinolinolato-lithium (Liq) as electron injection layer and aluminum (Al) as cathode layer were deposited by thermal evaporation at 5×10-5 Pa. The organic layers were deposited at the rates of 0.2-3 Å/s. After the organic film deposition, Liq and Al layer were deposited with rates of 0.1 and 3 Å/s, respectively. The emitting area of the device is about 0.09 cm2. The current density-voltage-luminance (*J-V-L*), EQE-*L* curves and electroluminescence spectra were measured using a Keithley 2400 source meter and an absolute EQE measurement system (C9920-12, Hamamatsu Photonics, Japan). The device operational lifetime (LT50) was evaluated by measuring the luminance over time at constant current densities (FS-MP64, Suzhou FSTAR Scientific Instrument Co. Ltd., China).

The TTA mode simulation can be described as follows.8-10

where *η*, *η*0, and *J*0 represent the EQEin the presence of triplet-triplet annihilation (TTA), initial EQEin the absence of TTA (at very low current densities, rendering the TTA quenching negligible), and the current density at the half-maximum of the EQE, respectively.

Assuming bulk limited transport, the equation for triplet-polaron annihilation (TPA) model can be expressed as follows:10

where *η*0 is the device EQE in the absence of TPQ, *J* stands for the current density of the device, and C is a constant which is related to the parameters like dielectric constant, carrier mobility, TPQ rate constant and decay lifetime of system. *l* needs to be an integer greater than 1 to make this equation reasonable, and here *l* = 2 after fitting.

**Schemes, Figures and Tables:**

**Supplementary Scheme 1.** Summary of high-order B,N-doped nanographenes (containing three or more boron atoms) for OLED applications.

**Supplementary Scheme 2.** Synthetic route of **QB-U**, **QB-J**, and **QB-I**.

**Supplementary Scheme 3.** Chemical structures of materials utilized in device fabrication.

**Supplementary Fig. 1.** 1H NMR spectrum of **1-1** in CDCl3 (500 MHz, 25oC).

**Supplementary Fig. 2.** 13C NMR spectrum of **1-1** in CDCl3 (125 MHz, 25oC).

**Supplementary Fig. 3.** 1H NMR spectrum of **1-2** in CDCl3 (500 MHz, 25oC).

**Supplementary Fig. 4.** 13C NMR spectrum of **1-2** in CDCl3 (125 MHz, 25oC).

**Supplementary Fig. 5.** 1H NMR spectrum of **1-3** in CDCl3 (500 MHz, 25oC).

**Supplementary Fig. 6.** 13C NMR spectrum of **1-3** in CDCl3 (125 MHz, 25oC).

**Supplementary Fig. 7.** 1H NMR spectrum of **1-4** in CDCl3 (500 MHz, 25oC).

**Supplementary Fig. 8.** 13C NMR spectrum of **1-4** in CDCl3 (125 MHz, 25oC).

**Supplementary Fig. 9.** 1H NMR spectrum of **QB-U** in CD2Cl2 (500 MHz, 25oC).

**Supplementary Fig. 10.** 13C NMR spectrum of **QB-U** in CS2/CD2Cl2 (125 MHz, 25oC).

**Supplementary Fig. 11.** 1H NMR spectrum of **2-1** in CDCl3 (500 MHz, 25oC).

**Supplementary Fig. 12.** 13C NMR spectrum of **2-1** in CDCl3 (125 MHz, 25oC).

**Supplementary Fig. 13.** 1H NMR spectrum of **2-2** in CDCl3 (500 MHz, 25oC).

**Supplementary Fig. 14.** 13C NMR spectrum of **2-2** in CDCl3 (125 MHz, 25oC).

**Supplementary Fig. 15.** 1H NMR spectrum of **2-3** in CDCl3 (500 MHz, 25oC).

**Supplementary Fig. 16.** 13C NMR spectrum of **2-3** in CDCl3 (125 MHz, 25oC).

**Supplementary Fig. 17.** 1H NMR spectrum of **2-4** in CDCl3 (500 MHz, 25oC).

**Supplementary Fig. 18.** 13C NMR spectrum of **2-4** in CDCl3 (125 MHz, 25oC).

**Supplementary Fig. 19.** 1H NMR spectrum of **2-5** in CDCl3 (500 MHz, 25oC).

**Supplementary Fig. 20.** 13C NMR spectrum of **2-5** in CDCl3 (125 MHz, 25oC).

**Supplementary Fig. 21.** 1H NMR spectrum of **2-6** in CDCl3 (500 MHz, 25oC).

**Supplementary Fig. 22.** 13C NMR spectrum of **2-6** in CDCl3 (125 MHz, 25oC).

**Supplementary Fig. 23.** 1H NMR spectrum of **QB-J** in CD2Cl2 (500 MHz, 25oC).

**Supplementary Fig. 24.** 13C NMR spectrum of **QB-J** in CS2/CD2Cl2 (125 MHz, 25oC).

**Supplementary Fig. 25.** Solvent-dependent variations in 1H NMR demonstrating conformational isomerism of **QB-J**.

**Supplementary Fig. 26.** 1H-1H COSY spectrum of **QB-J** in CD2Cl2 (500 MHz, 25oC).

**Supplementary Fig. 27.** 1H-1H NOESY spectrum of **QB-J** in CD2Cl2 (500 MHz, 25oC).

**Supplementary Fig. 28.** 1H NMR spectrum of **3-1** in CDCl3 (500 MHz, 25oC).

**Supplementary Fig. 29.** 13C NMR spectrum of **3-1** in CDCl3 (125 MHz, 25oC).

**Supplementary Fig. 30.** 1H NMR spectrum of **3-2** in CDCl3 (500 MHz, 25oC).

**Supplementary Fig. 31.** 13C NMR spectrum of **3-2** in CDCl3 (125 MHz, 25oC).

**Supplementary Fig. 32.** 1H NMR spectrum of **QB-I** in CD2Cl2 (500 MHz, 25oC).

**Supplementary Fig. 33.** 13C NMR spectrum of **QB-I** in CS2/CD2Cl2 (125 MHz, 25oC).

**Supplementary Fig. 34.** Solvent-dependent variations in 1H NMR demonstrating conformational isomerism of **QB-I**.

**Supplementary Fig. 35.** 1H-1H COSY spectrum of **QB-I** in CD2Cl2 (500 MHz, 25oC).

**Supplementary Fig. 36.** 1H-1H NOESY spectrum of **QB-I** in CD2Cl2 (500 MHz, 25oC).

**Supplementary Fig. 37.** HR-MS spectrum of **QB-U**.

**Supplementary Fig. 38.** HR-MS spectrum of **QB-J**.

**Supplementary Fig. 39.** HR-MS spectrum of **QB-I**.

**Supplementary Fig. 40.** Single crystal packing diagram of **QB-U**, representative dimeric unit is circled in pink.

**Supplementary Fig. 41.** Thermal gravimetric analysis (TGA) curves of (A) **QB-U**, (B) **QB-J**, and (C) **QB-I** at a heating rate of 10oC min-1, inset: differential scanning calorimetry (DSC) traces at a heating rate of 10oC min-1.


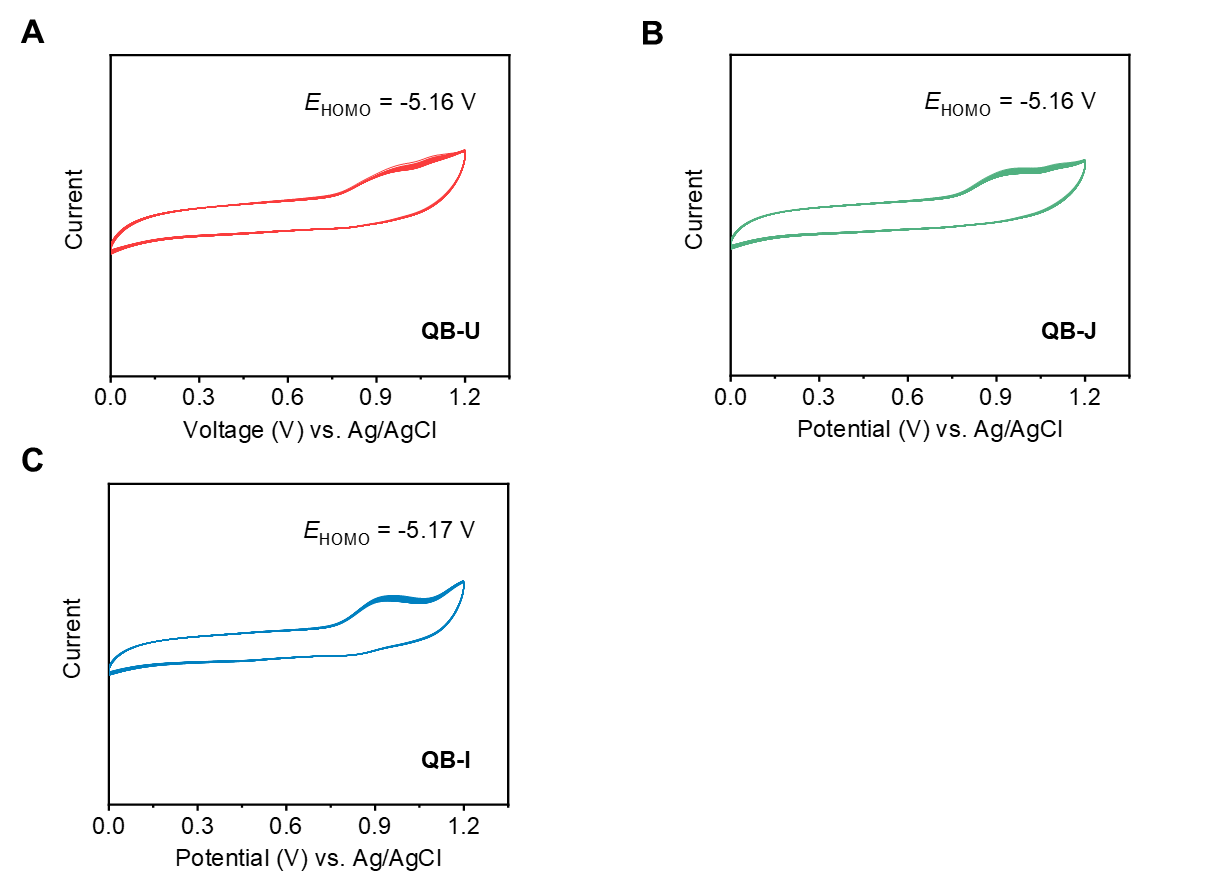


**Supplementary Fig. 42.** Cyclic voltammetry (CV) curves of (A) **QB-U**, (B) **QB-J**, and (C) **QB-I** in dichloromethane over 50 cycles.

**Supplementary Fig. 43.** Relative Gibbs free energy diagram (in kcal mol-1), molecular structure, frontier molecular orbital distributions, excited state energy levels and spin-orbit coupling constants for conformers of **QB-U**. The relative ratios of the **QB-U-1** and **QB-U-2** conformers in gas phase are estimated to be 89.8:10.2 according to the Boltzmann distribution.

**Supplementary Fig. 44.** Relative Gibbs free energy diagram (in kcal mol-1), molecular structure, frontier molecular orbital distributions, excited state energy levels and spin-orbit coupling constants for conformers of **QB-J**. The relative ratios of the **QB-J-1** and **QB-J-2** conformers in gas phase are estimated to be 59.1:40.9 according to the Boltzmann distribution.

**Supplementary Fig. 45.** Relative Gibbs free energy diagram (in kcal mol-1), molecular structure, frontier molecular orbital distributions, excited state energy levels and spin-orbit coupling constants for conformers of **QB-I**. The relative ratios of the **QB-I-1** and **QB-I-2** conformers in gas phase are estimated to be 55.8:44.2 according to the Boltzmann distribution.

**Supplementary Fig. 46.** Scanning tunneling microscopy (STM) images of **QB-U** monolayers on Au(111)/Mica substrate via thermal deposition, with figure D superimposed with chemical model overlay. Tunneling parameters (*U*tip/I): (A) +1.0 V/100 pA, (B) +1.0 V/100 pA, (C, D) +1.0 V/200 pA.

**Supplementary Fig. 47.** STM images of **QB-U** monolayers on Au(111)/Mica substrate via thermal deposition, with figure D superimposed with chemical model overlay. Tunneling parameters (*U*tip/I): (A) +1.5 V/20 pA, (B) +1.0 V/100 pA, (C, D) +1.0 V/50 pA.

**Supplementary Fig. 48.** STM images of **QB-I** monolayers on Au(111)/Mica substrate via thermal deposition, with figure D superimposed with chemical model overlay. The white curved arrows in figure A indicate two enantiomorphic domains on adjacent terraces. Tunneling parameters (*U*tip/I): (A) +1.0 V/100 pA, (B) +1.0 V/100 pA, (C, D) +0.5 V/100 pA.

**Supplementary Fig. 49.** Calculated natural transition orbitals (NTOs) of **QB-U**, **QB-J**, and **QB-I** for S1, T1 and T2 states with an iso-value of 0.03. The percentage inside the parentheses refer to the transition weight.

**Supplementary Fig. 50.** The molar extinction coefficient-wavelength character of the emitters in toluene solutions.

**Supplementary Fig. 51.** Absorption and fluorescence spectra of (A, B) **QB-U**, (C, D) **QB-J**, and (E, F) **QB-I** in different solvents at concentration of 2×10-6 M.

**Supplementary Fig. 52.** CIE coordinates of the emitters in (A) toluene solutions and (B) 1 wt% DOBNA-OAr-doped films.

**Supplementary Fig. 53.** Steady-state photoluminescence spectra (SSPL) and phosphorescence spectra (Phos.) at 77 K of (A) **QB-U**, (B) **QB-J** and (C) **QB-I** in 2×10-6 M toluene solutions, in energy scale.

**Supplementary Fig. 54.** Transient photoluminescence (TR-PL) decay curves at μs-scale of (A) **QB-U**, (B) **QB-J**, and (C) **QB-I** in the film state (1 wt% in DOBNA-OAr) at 300 K, theoretical decay curves from bi-exponential fit procedure are shown as black dash lines, inset: corresponding curves at ns-scale.

**Supplementary Fig. 55.** Molecular conformation and transition dipole moment at optimized S1 geometry of (A) **QB-U**, (B) **QB-J**, and (C) **QB-I**.

**Supplementary Fig. 56.** Electroluminescence (EL) spectra of the devices based on (A) **QB-U**, (B) **QB-J**, and (C) **QB-I** at various driving voltages.

**Supplementary Fig. 57.** Current efficiency and power efficiency versus luminance (CE-*L*-PE) curves of the devices based on (A) **QB-U**, (B) **QB-J**, and (C) **QB-I**.

**Supplementary Fig. 58.** Efficiency roll-off fitting results of external quantum efficiency versus current density (EQE-*J*) curves of the devices employing (A) **QB-U**, (B) **QB-J** and (C) **QB-I**, TTA and TPA indicate triplet-triplet annihilation and triplet-polaron annihilation, respectively. (D) Correlations between *J*90 and *k*r*k*eq, *J*90 indicates the current density at which EQE decreases to 90% of its peak value, *k*r*k*eq is the figure of merit for efficiency roll-off, which equals.

**Supplementary Fig. 59.** (A) The operation lifetime of the devices at specified initial luminance (*L*0) of 500 cd m-2 and (B) the estimated operation lifetime at 100 cd m-2 by employing a degradation accelerating factor (*n*) of 1.75.

**Supplementary Fig. 60.** (A) External quantum efficiency versus luminance (EQE-*L*) curves and (B) box charts displaying EQE variation in a batch of 8 devices based on **QB-U**.

**Supplementary Table 1.** Crystal data and structure refinement for **QB-U**.

| Identification code | **QB-U** |
| --- | --- |
| Empirical formula | C90H72B4N6·1.5C6H5Cl·O |
| Formula weight | 1280.85 |
| Temperature/K | 150.00 |
| Crystal system | monoclinic |
| Space group | P21/*n* |
| a/Å | 20.6900(6) |
| b/Å | 8.1137(3) |
| c/Å | 47.5281(16) |
| α/° | 90 |
| β/° | 95.490(2) |
| γ/° | 90 |
| Volume/Å3 | 7942.1(5) |
| Z | 4 |
| ρcalcg/cm3 | 1.226 |
| μ/mm‑1 | 0.998 |
| F(000) | 3076.0 |
| Crystal size/mm3 | 0.4 × 0.1 × 0.1 |
| Radiation | CuKα (λ = 1.54178) |
| 2Θ range for data collection/° | 3.736 to 136.806 |
| Index ranges | -24 ≤ h ≤ 24, -9 ≤ k ≤ 9, -54 ≤ l ≤ 57 |
| Reflections collected | 97382 |
| Independent reflections | 14566 [Rint = 0.0874, Rsigma = 0.0832] |
| Data/restraints/parameters | 14566/138/1046 |
| Goodness-of-fit on F2 | 1.057 |
| Final R indexes [I>=2σ (I)] | R1 = 0.0874, wR2 = 0.2491 |
| Final R indexes [all data] | R1 = 0.1223, wR2 = 0.2891 |
| Largest diff. peak/hole / e Å-3 | 1.22/-0.71 |

**Supplementary Table 2.** Summary of TD-DFT data for **QB-U**, **QB-J**, and **QB-I** at the B3LYP/6-31G(d,p) level of theory, using optimized S1 geometry.

| Compound | Transition | Wavelength (nm) | Energy (eV) | Oscillator Strength | Coefficient of Orbital |
| --- | --- | --- | --- | --- | --- |
| **QB-U-1** | S0-S1 | 435 | 2.85 | 0.1521 | HOMO→LUMO (92.44%) |
| S0-T1 | 495 | 2.50 | 0.0000 | HOMO-1→LUMO+1 (2.71%)  HOMO→LUMO (80.30%)  HOMO→LUMO+3 (3.58%) |
| S0-T2 | 470 | 2.64 | 0.0000 | HOMO-1→LUMO (59.36%)  HOMO-1→LUMO+1(13.49%)  HOMO-1→LUMO+3 (6.58%)  HOMO→LUMO+1 (2.83%)  HOMO→LUMO+3 (7.09%) |
| S0-T3 | 453 | 2.74 | 0.0000 | HOMO-1→LUMO (2.22%)  HOMO-1→LUMO+2 (9.67%)  HOMO→LUMO+1 (61.00%)  HOMO→LUMO+2 (9.50%)  HOMO→LUMO+3 (6.95%) |
| **QB-U-2** | S0-S1 | 432 | 2.87 | 0.0083 | HOMO-1→LUMO+1(5.47%)  HOMO→LUMO(91.23%) |
| S0-T1 | 492 | 2.52 | 0.0000 | HOMO-2→LUMO(2.62%)  HOMO-1→LUMO+1(5.11%)  HOMO-1→LUMO+2(5.49%)  HOMO→LUMO(76.24%) |
| S0-T2 | 472 | 2.63 | 0.0000 | HOMO-1→LUMO(61.27%)  HOMO→LUMO+1(7.32%)  HOMO→LUMO+2(23.20%) |
| S0-T3 | 457 | 2.71 | 0.0000 | HOMO-3→LUMO+3(2.01%)  HOMO-1→LUMO(4.10%)  HOMO-1→LUMO+3(15.82%)  HOMO→LUMO+1(70.20%)  HOMO→LUMO+2(3.25%) |
| **QB-J-1** | S0-S1 | 439 | 2.82 | 0.5133 | HOMO-1→LUMO (2.96%)  HOMO→LUMO (90.63%) |
| S0-T1 | 492 | 2.52 | 0.0000 | HOMO-1→LUMO(17.06%)  HOMO-1→LUMO+2(2.55%)  HOMO-1→LUMO+3(2.74%)  HOMO→LUMO(63.99%) |
| S0-T2 | 470 | 2.64 | 0.0000 | HOMO-1→LUMO (52.96%)  HOMO→LUMO(16.26%)  HOMO→LUMO+1(12.09%)  HOMO→LUMO+2(5.52%)  HOMO→LUMO+3(5.23%) |
| S0-T3 | 460 | 2.69 | 0.0000 | HOMO-2→LUMO (5.70%)  HOMO-2→LUMO+2 (2.21%)  HOMO-1→LUMO (3.11%)  HOMO-1→LUMO+1 (7.32%)  HOMO-1→LUMO+2 (3.67%)  HOMO-1→LUMO+3 (3.39%)  HOMO→LUMO+1 (33.36%)  HOMO→LUMO+2 (30.90%) |
| **QB-J-2** | S0-S1 | 439 | 2.82 | 0.5270 | HOMO-1→LUMO(3.89%)  HOMO→LUMO(89.27%) |
| S0-T1 | 493 | 2.51 | 0.0000 | HOMO-1→LUMO(20.71%)  HOMO-1→LUMO+2(2.41%)  HOMO-1→LUMO+3(2.33%)  HOMO→LUMO(61.18%) |
| S0-T2 | 470 | 2.64 | 0.0000 | HOMO-1→LUMO(51.32%)  HOMO→LUMO(17.41%)  HOMO→LUMO+1(12.14%)  HOMO→LUMO+3(5.19%) |
| S0-T3 | 460 | 2.69 | 0.0000 | HOMO-2→LUMO(5.47%)  HOMO-2→LUMO+2(2.19%)  HOMO-1→LUMO(2.69%)  HOMO-1→LUMO+1(6.30%)  HOMO-1→LUMO+2(2.82%)  HOMO-1→LUMO+3(3.63%)  HOMO→LUMO+1(34.94%)  HOMO→LUMO+2(32.33%) |
| **QB-I-1** | S0-S1 | 442 | 2.80 | 0.8766 | HOMO→LUMO (94.23%) |
| S0-T1 | 488 | 2.54 | 0.0000 | HOMO-1→LUMO+3 (4.44%)  HOMO→LUMO (91.04%) |
| S0-T2 | 467 | 2.65 | 0.0000 | HOMO-2→LUMO (14.13%)  HOMO-1→LUMO+2 (15.74%)  HOMO→LUMO+1 (55.62%)  HOMO→LUMO+3 (3.67%) |
| S0-T3 | 450 | 2.75 | 0.0000 | HOMO-2→LUMO (6.79%)  HOMO-1→LUMO (56.18%)  HOMO→LUMO+1 (11.72%)  HOMO→LUMO+3 (16.38%) |
| **QB-I-2** | S0-S1 | 444 | 2.79 | 0.8573 | HOMO→LUMO (94.39%) |
| S0-T1 | 490 | 2.53 | 0.0000 | HOMO-1→LUMO+3 (4.32%)  HOMO→LUMO (91.29%) |
| S0-T2 | 468 | 2.65 | 0.0000 | HOMO-2→LUMO (15.35%)  HOMO-1→LUMO+2 (14.93%)  HOMO→LUMO+1 (53.55%)  HOMO→LUMO+3 (4.02%) |
| S0-T3 | 451 | 2.75 | 0.0000 | HOMO-2→LUMO (5.95%)  HOMO-1→LUMO (54.56%)  HOMO→LUMO+1 (13.56%)  HOMO→LUMO+3 (15.05%) |

**Supplementary Table 3.** Computed energy levels of the least-energy conformer for **QB-U**, **QB-J**, and **QB-I** at the optimized S1 geometry using different methods.

| Method | B3LYP/6-31G(d,p) | | | mPW2PLYP/def2SVP | | |
| --- | --- | --- | --- | --- | --- | --- |
| Energy level (eV) | S1 | T1 | Δ*E*ST | S1 | T1 | Δ*E*ST |
| **QB-U** | 2.85 | 2.50 | 0.35 | 3.24 | 3.09 | 0.15 |
| **QB-J** | 2.83 | 2.52 | 0.31 | 3.18 | 3.07 | 0.11 |
| **QB-I** | 2.80 | 2.54 | 0.26 | 3.11 | 3.11 | 0.00 |

**Supplementary Table 4.** The emission profiles of emittersin solution states.

| Solvent | **QB-U** | | **QB-J** | | **QB-I** | |
| --- | --- | --- | --- | --- | --- | --- |
| *λ*em (nm) | FWHM  (nm/eV) | *λ*em  (nm) | FWHM  (nm/eV) | *λ*em  (nm) | FWHM  (nm/eV) |
| Cyclohexane | 441 | 19/0.12 | 448 | 13/0.08 | 458 | 11/0.07 |
| Isopropyl ether | 446 | 20/0.12 | 450 | 15/0.09 | 460 | 13/0.07 |
| Toluene | 450 | 21/0.13 | 454 | 15/0.09 | 464 | 13/0.07 |
| Chlorobenzene | 454 | 23/0.14 | 458 | 17/0.10 | 468 | 15/0.09 |
| Dichloromethane | 458 | 27/0.16 | 460 | 22/0.13 | 469 | 19/0.10 |

**Supplementary Table 5.** Thermal and electrochemical properties of **QB-U**, **QB-J**, and **QB-I**.

| Compounds | *T*d  (oC) | *T*g  (oC) | *E*HOMO  (eV) | *E*LUMO  (eV) | *E*g  (eV) |
| --- | --- | --- | --- | --- | --- |
| **QB-U** | 511 | - | -5.16 | -2.44 | 2.72 |
| **QB-J** | 524 | - | -5.16 | -2.48 | 2.68 |
| **QB-I** | 556 | - | -5.17 | -2.54 | 2.63 |

**Supplementary Table 6.** Summary of the representative boron/nitrogen-based MR-TADF emitters with high *k*RISC and their EL performance.

| Emitter | λEL  (nm) | FWHM (nm) | *k*r  (× 108 s-1) | *k*RISC  (× 105 s-1) | Reference |
| --- | --- | --- | --- | --- | --- |
| ν-DABNA | 469 | 18 | 2.0 | 2.0 | *Nat. Photonics* **13**, 678 (2019) |
| ν-DABNA-O-Me | 465 | 23 | 1.4 | 1.6 | *Angew. Chem. Int. Ed.* **60**, 17910 (2021**)** |
| V-DABNA-Mes | 480 | 17 | 1.1 | 4.4 | *J. Am. Chem. Soc.* **144**, 106 (2022) |
| V-DABNA | 483 | 17 | 1.2 | 5.7 | *Adv. Sci.* **10**, 2205070 (2022) |
| V-DABNA-F | 468 | 15 | 1.1 | 6.5 |
| ν-DABNA-CN-Me | 504 | 23 | 1.7 | 1.0 | *Adv. Mater.* **34**, 72201778 (2022) |
| *ω*-DABNA | 512 | 25 | 1.4 | 1.2 | *J. Am. Chem. Soc*. **145**, 1505 (2022) |
| DBTN-2 | 520 | 29 | 2.7 | 1.1 | *Nat. Photonics* **17**, 280 (2023) |
| m-Cz-BNCZ | 528 | 45 | 0.6 | 10.8 | *Angew. Chem. Int. Ed*. **59**, 17442 (2020) |
| BN-DPAC | 516 | 50 | 1.3 | 1.3 | *Adv. Opt. Mater.* **9**, 2100825 (2021) |
| BN3 | 458 | 23 | 1.7 | 2.6 | *Angew. Chem. Int. Ed.* **61**, e202201588 (2022) |
| DMAC-BN | 458 | 23 | 1.3 | 2.4 | *J. Mater. Chem. C* **9**, 8308 (2021) |
| BN2 | 547 | - | 0.01 | 2.1 | *Chem. Sci.* **13**, 1665 (2022) |
| TCz-BN2 | 554 | - | 0.02 | 2.4 |
| m-ν-DABNA | 471 | 18 | 0.93 | 2.3 | *Chem. Eng. J.* **432**, 134381 (2022) |
| 4F-ν-DABNA | 464 | 18 | 0.89 | 2.3 |
| 4F-m-ν DABNA | 461 | 18 | 0.94 | 2.1 |
| BBCZ-G | 515 | 54 | 0.8 | 1.9 | *J. Am. Chem. Soc.* **142**, 19468 (2020) |
| BBCZ-Y | 549 | 48 | 0.7 | 1.1 |
| DPXZCZBN | 505 | 36 | 1.0 | 1.1 | *J. Mater. Chem. C.* **10**, 768 (2022) |
| CNCz-BNCZ | 583 | 49 | 0.2 | 4.2 | *Chem. Sci.* **12**, 9408 (2021) |
| TRZCzPh-BNCZ | 513 | 37 | 2.5 | 21.3 | *Angew. Chem. Int. Ed*. **61**, e202210210 (2022) |
| TRZTPh-BNCz | 513 | 33 | 2.4 | 15.5 |
| NBNP | 502 | 33 | 0.9 | 3.0 | *Adv. Opt. Mater.* **10**, 2102513 (2022) |
| VTCzBN | 499 | 38 | 0.3 | 10.0 | *Angew. Chem. Int. Ed.* **61**, e202209984 (2022) |
| TCz-VTCzBN | 524 | 37 | 0.1 | 9.0 |
| BNCZPTZ | 524 | 57 | 0.04 | 1.5 | ***Mater. Chem. Front.*** **7**, 929 (2023) |
| CzB4 | - | - | 1.6 | 1.8 | *J. Am. Chem. Soc.* **145**, 11504 (2023) |
| CzB6 | - | - | 2.6 | 3.0 |
| CzB7 | - | - | 2.6 | 6.5 |
| (BzIPr)AuBN | 510 | 34 | 0.8 | 50.0 | *Angew. Chem. Int. Ed.* **61**, e202213392 (2022) |
| (PyIPr)AuBN | 512 | 37 | 0.1 | 32.0 |
| PTZBN1 | 496 | 47 | 2.1 | 1.1 | *Adv. Funct. Mater*. **32**, 2201032 (2022) |
| PTZBN2 | 483 | 43 | 2.2 | 4.5 |
| PTZBN3 | 476 | 36 | 1.7 | 1.1 |
| BSBS-N1 | 478 | 25 | 0.9 | 19.0 | *Angew. Chem. Int. Ed.* **60**, 20280 (2021) |
| BOBS-Z | 456 | 23 | 1.3 | 8.6 | *Adv. Mater.* **34**, 2107951(2022) |
| BSBS-Z | 463 | 22 | 0.8 | 16.0 |
| CzBS | 473 | 31 | 0.3 | 2.2 | *Angew. Chem. Int. Ed.* **61**, e202205684 (2022) |
| CzBSe | 481 | 33 | 0.05 | 1800.0 |
| DCz-BSN | 473 | 29 | - | 1.0 | *Chem. Eur. J.* **28**, e202104214 (2022) |
| Cz-BSeN | 490 | 36 | 0.04 | 75.0 | *ACS Appl. Mater. Interfaces* **14**, 49995 (*2022*) |
| DCz-BSeN | 481 | 32 | 0.05 | 80.0 |
| 2PTZBN | 520 | 52 | 0.5 | 1.9 | *Nat. Photonics.* **16**, 803 (2022) |
| BNSSe | 520 | 50 | 0.4 | 6.0 |
| BNSeSe | 514 | 48 | 0.3 | 20.0 |
| DCzBN-Au | 508 | 34 | 0.06 | 230.0 | *Adv. Mater.* **35**, 2208378 (2023) |
| BN-STO | 517 | 34 | 0.6 | 1.2 | *Angew. Chem. Int. Ed.* **62**, e202302478 (2023) |
| DTBA-B2N3 | 475 | 28 | 2.2 | 16.0 | *Angew. Chem. Int. Ed.* **62**, e202218405 (2023) |
| **QB-U** | 453 | 23 | 0.9 | 1.6 | **This work** |
| **QB-J** | 457 | 17 | 1.5 | 6.9 |
| **QB-I** | 466 | 15 | 2.4 | 27.2 |

Compounds labeled in red indicate MR-TADF emitters that incorporate heavy atoms.

**Supplementary Table 7.** Summary of the representative deep-blue OLEDs performance employing MR-TADF emitters (CIEy ≤0.10).

| Emitter | Von  [V] | *λ*EL  [nm] | FWHM  [nm] | EQE [%]  Max/100/1000 | CIE (x, y) | Reference |
| --- | --- | --- | --- | --- | --- | --- |
| V-DABNA-F | 3.3 | 468 | 15 | 26.6/25.8/23.4 | (0.12, 0.10) | *Adv. Sci.* **10**, 2205070 (2022) |
| ν-DABNA-OMe | 3.4 | 465 | 23 | 29.5/28.8/26.9 | (0.13, 0.10) | *Angew. Chem. Int. Ed.* **60**, 17910 (2021) |
| DABNA-1 | - | 459 | 28 | 13.5/6.0/- | (0.13, 0.09) | *Adv. Mater.* **28**, 2777 (2016) |
| BOBO-Z | 4.5 | 445 | 18 | 13.6/9.8/3.3 | (0.15, 0.04) | *Adv. Mater.* **34**, 2107951 (2022) |
| BOBS-Z | 4.0 | 456 | 23 | 26.9/24.0/15.0 | (0.14, 0.06) |
| BSBS-Z | 4.0 | 463 | 22 | 26.8/24.0/15.9 | (0.13, 0.08) |
| CzBO | 41 | 448 | 30 | 13.4/8.4/3.5 | (0.15, 0.05) | *Angew. Chem. Int. Ed.* **61**, e202205684 (2022) |
| BN1 | 4.0 | 457 | 28 | 31.2/18.3/9.3 | (0.14, 0.08) | *Angew. Chem. Int. Ed.* **61**, e202201588 (2022) |
| BN3 | 4.3 | 458 | 23 | 37.6/34.0/26.2 | (0.14, 0.08) |
| t-DABNA | 8.2 | 464 | 26 | 28.4/14.8/4.4 | (0.13, 0.10) | *Mater. Today Energy* **21**, 100792 (2021) |
| t-DAB-DPA | 7.5 | 459 | 26 | 27.6/21.8/9.2 | (0.14, 0.08) |
| 4F-ν-DABNA | 3.7 | 464 | 18 | 35.8/-/- | (0.13, 0.08) | *Chem. Eng. J.* **432**, 134381 (2022) |
| 4F-m-ν-DABNA | 3.7 | 461 | 18 | 33.7/-/- | (0.13, 0.06) |
| DPACzBN2 | 3.7 | 469 | 28 | 24.0/23.5/14.3 | (0.13, 0.10) | *ACS Appl. Mater. Interfaces* **13**, 59035 (2021) |
| BFCz-DABNA | 2.7 | 463 | 26 | 28.0/-/- | (0.13, 0.09) | *ACS Appl. Mater. Interfaces* **14**, 36927 (2022 |
| CzCO | - | 432 | 35 | 15.6/-/- | (0.157, 0.071) | *Angew. Chem. Int. Ed.* **135**, e202215226 (2023) |
| Cz2CO | - | 445 | 23 | 13.0/-/- | (0.154, 0.051) |
| C-BN | 3.5 | 453 | 25 | 20.1/13.8/6.0 | (0.14, 0.07) | *Angew. Chem. Int. Ed.* **61**, e202213585 (2022) |
| NOBN | 4.2 | 409 | 37 | 8.5/-/- | (0.173, 0.055) | *Angew. Chem. Int. Ed.* **62**, e202215522 (2023) |
| DBCz-Mes | 3.1 | 452 | 17 | 33.9/-/- | (0.144, 0.058) | *Sci. Adv.* **9**, eadh1434 (2023) |
| TPD4PA | 3.1 | 455 | 29 | 30.7/30.6/17.8 | (0.14, 0.06) | *Chem. Eng. J.* **451***,*138498 (2023) |
| *t*Bu-TPD4PA | 3.1 | 460 | 29 | 32.5/30.9/25 | (0.14, 0.07) |
| **QB-U** | 3.8 | 453 | 23 | 24.7/17.1/11.5 | (0.142, 0.064) | **This work** |
| **QB-J** | 3.7 | 457 | 17 | 30.8/26.3/20.9 | (0.141, 0.060) |
| **QB-I** | 3.7 | 466 | 15 | 32.5/32.5/30.4 | (0.127, 0.078) |

**Supplementary Table 8.** Cartesian coordinates of **QB-U-1** at the optimized S0 geometry.

| N | -2.431417 | 1.530546 | -1.503789 |  | H | 4.415572 | 5.838790 | 0.791790 |
| --- | --- | --- | --- | --- | --- | --- | --- | --- |
| N | 2.422803 | 1.536772 | -1.506244 | C | 4.479480 | -4.676915 | -1.462588 |
| N | -4.979855 | -2.492726 | -0.569698 | H | 5.379710 | -5.057292 | -0.996417 |
| N | 6.567414 | 1.781537 | 1.003127 | C | -8.905498 | -0.366580 | 2.975510 |
| N | -6.585264 | 1.765051 | 0.992512 | H | -8.920660 | -0.900426 | 3.922020 |
| N | 4.991628 | -2.476801 | -0.590772 | C | 3.432321 | 5.126870 | -1.699971 |
| C | -1.220482 | 0.803497 | -1.678715 | H | 4.136530 | 5.811542 | -1.241591 |
| C | 1.213770 | 0.806584 | -1.680050 | C | 8.841298 | 0.978455 | 0.611593 |
| C | -3.548096 | 0.899798 | -0.935526 | C | 2.522254 | -5.045102 | -2.841568 |
| C | -3.659123 | -0.506044 | -1.027568 | H | 1.909519 | -5.707298 | -3.444837 |
| C | -0.004161 | 1.484294 | -1.566374 | C | 2.656604 | 5.570284 | -2.760329 |
| H | -0.005250 | 2.540300 | -1.339573 | H | 2.721929 | 6.599472 | -3.098962 |
| C | -4.122640 | -3.331313 | -1.299648 | C | 6.186702 | 5.860313 | 1.985447 |
| C | 3.657157 | -0.496098 | -1.032102 | H | 6.075753 | 6.899906 | 2.276620 |
| C | -3.398182 | 3.789132 | -1.224067 | C | 5.942439 | -3.450810 | 1.438303 |
| C | 1.240586 | -0.605444 | -1.843462 | C | -8.402207 | -3.619511 | 0.366980 |
| C | -2.511011 | 2.900439 | -1.883961 | H | -9.394950 | -3.675777 | -0.071688 |
| C | -4.814708 | -1.112364 | -0.471485 | C | 8.455545 | -3.574647 | 0.211248 |
| C | -0.000591 | -1.252797 | -1.900238 | H | 9.433035 | -3.611325 | -0.262312 |
| H | 0.000674 | -2.334773 | -1.908634 | C | -7.295593 | 5.082213 | 2.449483 |
| C | -2.935914 | -2.824898 | -1.898926 | H | -8.041036 | 5.533067 | 3.098112 |
| C | -1.243425 | -0.608714 | -1.841824 | C | -6.214142 | 5.841180 | 1.986824 |
| C | -5.626274 | 1.025756 | 0.302571 | H | -6.105971 | 6.880178 | 2.281157 |
| C | 4.510932 | 1.705921 | -0.288000 | C | -10.004513 | -0.457218 | 2.118657 |
| C | 4.816715 | -1.098747 | -0.480169 | C | -8.215272 | -4.010500 | 1.694427 |
| C | -4.520453 | 1.693958 | -0.286107 | C | 7.523232 | -2.614034 | -1.940966 |
| C | -6.074752 | -3.069069 | 0.170318 | H | 6.822771 | -3.118280 | -2.613737 |
| C | 3.541432 | 0.909151 | -0.938286 | H | 8.539016 | -2.788560 | -2.302859 |
| C | 2.499011 | 2.906303 | -1.887915 | H | 7.314851 | -1.540565 | -2.005777 |
| C | 5.616551 | 1.040350 | 0.304226 | C | -4.472109 | -3.331960 | 2.100122 |
| C | -5.785512 | -0.358440 | 0.194885 | H | -3.737322 | -3.909866 | 1.530618 |
| H | -6.643917 | -0.841002 | 0.628655 | H | -4.463899 | -3.685108 | 3.133739 |
| C | 3.384308 | 3.797583 | -1.229142 | H | -4.134712 | -2.290050 | 2.088763 |
| C | -2.170895 | -3.720529 | -2.674018 | C | -8.796787 | 1.709283 | -0.794137 |
| H | -1.292890 | -3.337780 | -3.182880 | H | -8.629879 | 2.782567 | -0.658334 |
| C | 6.116954 | -3.047438 | 0.106606 | H | -9.724657 | 1.571689 | -1.353847 |
| C | -5.381557 | 3.896624 | 0.743044 | H | -7.967542 | 1.333120 | -1.402773 |
| C | -1.765326 | 3.339169 | -2.992148 | C | 7.699550 | 0.422692 | 2.706581 |
| H | -1.153918 | 2.634230 | -3.539204 | C | 8.320371 | -3.987110 | 1.538838 |
| C | 2.941093 | -2.815200 | -1.908546 | C | -7.558434 | -2.678467 | -1.830464 |
| C | 5.782548 | -0.343052 | 0.192158 | H | -7.378771 | -1.600978 | -1.913079 |
| H | 6.642164 | -0.823540 | 0.626242 | H | -8.580792 | -2.881075 | -2.157583 |
| C | -7.769172 | 1.058994 | 1.415116 | H | -6.867557 | -3.173242 | -2.519829 |
| C | -6.459265 | 3.133876 | 1.274164 | C | 7.056665 | -3.919508 | 2.135324 |
| C | 6.438471 | 3.151086 | 1.280903 | H | 6.937593 | -4.229224 | 3.170630 |
| C | 1.752193 | 3.341883 | -2.996591 | B | -4.399894 | 3.192683 | -0.211257 |
| H | 1.142123 | 2.634845 | -3.542458 | C | 8.821562 | 1.661034 | -0.730584 |
| C | -4.460514 | -4.693547 | -1.434065 | H | 9.764574 | 1.508778 | -1.260405 |
| H | -5.355365 | -5.076627 | -0.959633 | H | 8.653053 | 2.737450 | -0.625020 |
| C | -3.448567 | 5.119113 | -1.692667 | H | 8.009093 | 1.271347 | -1.353239 |
| H | -4.154018 | 5.801676 | -1.233013 | B | -2.584680 | -1.344792 | -1.666499 |
| C | 5.363215 | 3.911680 | 0.741866 | B | 2.584676 | -1.337303 | -1.671138 |
| C | -2.510943 | -5.056383 | -2.825197 | C | -6.573386 | 0.443881 | 3.548651 |
| H | -1.898582 | -5.717742 | -3.429765 | H | -6.771731 | -0.068106 | 4.492966 |
| C | 4.134676 | -3.317204 | -1.319278 | H | -6.289074 | 1.477929 | 3.766187 |
| C | -3.657827 | -5.539898 | -2.184388 | H | -5.709865 | -0.034358 | 3.073741 |
| H | -3.937723 | -6.584813 | -2.281862 | C | 9.933104 | 0.216741 | 1.029735 |
| C | 7.733724 | 1.071833 | 1.466435 | H | 10.796229 | 0.130311 | 0.374370 |
| C | 1.822349 | 4.660671 | -3.418049 | C | 8.814218 | -0.331640 | 3.085223 |
| H | 1.246406 | 4.972671 | -4.283416 | H | 8.797897 | -0.849678 | 4.040425 |
| C | 2.175792 | -3.711902 | -2.682139 | B | 4.386065 | 3.204375 | -0.214308 |
| H | 1.292482 | -3.331859 | -3.183706 | C | 4.589746 | -3.343289 | 2.091257 |
| C | 7.365518 | -3.099846 | -0.524562 | H | 4.247244 | -2.303120 | 2.108414 |
| C | -8.855558 | 0.994824 | 0.530215 | H | 4.621458 | -3.712128 | 3.118931 |
| C | 7.394471 | 3.765315 | 2.115928 | H | 3.837401 | -3.916547 | 1.540283 |
| H | 8.222712 | 3.186058 | 2.504207 | C | -11.206125 | -1.295580 | 2.475878 |
| C | -5.284957 | 5.244101 | 1.148063 | H | -12.137461 | -0.736334 | 2.339649 |
| H | -4.436280 | 5.824671 | 0.802909 | H | -11.163894 | -1.634322 | 3.514241 |
| C | -7.344151 | -3.143156 | -0.414410 | H | -11.265668 | -2.184898 | 1.838507 |
| C | -5.847453 | -3.456089 | 1.499495 | C | 9.936693 | -0.445908 | 2.261887 |
| C | 7.266152 | 5.103486 | 2.456074 | C | 6.474192 | 0.508213 | 3.577335 |
| H | 8.007721 | 5.556669 | 3.107520 | H | 6.634619 | -0.004400 | 4.528479 |
| C | -7.774496 | 0.386034 | 2.642576 | H | 5.614198 | 0.047761 | 3.079221 |
| C | -1.837935 | 4.658497 | -3.411536 | H | 6.206177 | 1.548916 | 3.784203 |
| H | -1.262536 | 4.972876 | -4.276390 | C | -9.368618 | -4.497608 | 2.535196 |
| C | -2.673625 | 5.565657 | -2.752260 | H | -9.132448 | -5.448979 | 3.023113 |
| H | -2.740666 | 6.595295 | -3.089182 | H | -10.270101 | -4.641092 | 1.934005 |
| C | -9.964649 | 0.235452 | 0.903504 | H | -9.607360 | -3.778162 | 3.326352 |
| H | -10.812811 | 0.174553 | 0.226063 | C | 9.502123 | -4.513820 | 2.313699 |
| C | -6.930101 | -3.927734 | 2.241891 | H | 9.452653 | -5.604258 | 2.417376 |
| H | -6.769160 | -4.228156 | 3.274307 | H | 9.532323 | -4.094487 | 3.324185 |
| C | -7.420635 | 3.744766 | 2.105267 | H | 10.445384 | -4.270874 | 1.818510 |
| H | -8.250160 | 3.163186 | 2.487502 | C | 11.138713 | -1.248541 | 2.692411 |
| C | 3.676466 | -5.524571 | -2.211076 | H | 11.965538 | -0.593038 | 2.990511 |
| H | 3.961758 | -6.567410 | -2.314965 | H | 11.505688 | -1.880840 | 1.877886 |
| C | 5.263051 | 5.260108 | 1.142893 | H | 10.904930 | -1.894155 | 3.542392 |

**Supplementary Table 9.** Cartesian coordinates of **QB-U-1** at the optimized S1 geometry.

| N | -2.442499 | 1.417977 | -1.545512 |  | H | 4.350654 | 5.918288 | 0.625615 |
| --- | --- | --- | --- | --- | --- | --- | --- | --- |
| N | 2.407537 | 1.456880 | -1.505033 | C | 4.676112 | -4.676613 | -1.402284 |
| N | -4.989871 | -2.559745 | -0.443315 | H | 5.629857 | -5.000203 | -1.004789 |
| N | 6.489171 | 1.862942 | 1.058763 | C | -8.973184 | -0.277526 | 2.934469 |
| N | -6.628245 | 1.767082 | 0.889818 | H | -9.000721 | -0.768629 | 3.903607 |
| N | 5.154714 | -2.435759 | -0.633834 | C | 3.291367 | 5.074121 | -1.816718 |
| C | -1.228872 | 0.688781 | -1.656463 | H | 3.941469 | 5.814991 | -1.366150 |
| C | 1.214161 | 0.707790 | -1.636651 | C | 8.749353 | 0.911015 | 1.114877 |
| C | -3.571798 | 0.813749 | -0.959993 | C | 2.620704 | -5.169582 | -2.581201 |
| C | -3.674159 | -0.592947 | -0.991415 | H | 1.984969 | -5.878225 | -3.102621 |
| C | -0.015808 | 1.383861 | -1.573984 | C | 2.523927 | 5.438900 | -2.918462 |
| H | -0.025182 | 2.450393 | -1.403905 | H | 2.546698 | 6.460858 | -3.284541 |
| C | -4.114260 | -3.436811 | -1.111439 | C | 6.089752 | 5.972244 | 1.859291 |
| C | 3.702946 | -0.526093 | -1.016319 | H | 5.976845 | 7.025610 | 2.097381 |
| C | -3.419209 | 3.684516 | -1.390840 | C | 6.584740 | -3.299386 | 1.162283 |
| C | 1.253680 | -0.715093 | -1.727958 | C | -8.417962 | -3.649941 | 0.515017 |
| C | -2.523548 | 2.764587 | -1.997406 | H | -9.405957 | -3.732568 | 0.069599 |
| C | -4.834238 | -1.175136 | -0.416186 | C | 8.783676 | -3.224416 | -0.571004 |
| C | 0.018234 | -1.366875 | -1.758549 | H | 9.637176 | -3.192413 | -1.243429 |
| H | 0.021117 | -2.447830 | -1.722947 | C | -7.371912 | 5.150727 | 2.164737 |
| C | -2.914979 | -2.955901 | -1.710589 | H | -8.127172 | 5.631061 | 2.779949 |
| C | -1.242347 | -0.729754 | -1.738804 | C | -6.288053 | 5.889992 | 1.674281 |
| C | -5.659783 | 0.998426 | 0.246610 | H | -6.188735 | 6.943900 | 1.914156 |
| C | 4.486840 | 1.730264 | -0.305967 | C | -10.059535 | -0.409442 | 2.066898 |
| C | 4.894577 | -1.076925 | -0.505853 | C | -8.243323 | -3.972201 | 1.862483 |
| C | -4.546517 | 1.638417 | -0.357220 | C | 7.338602 | -2.396311 | -2.478302 |
| C | -6.089816 | -3.101067 | 0.313393 | H | 6.599829 | -3.014643 | -2.997591 |
| C | 3.558466 | 0.879958 | -0.940172 | H | 8.278879 | -2.443348 | -3.031752 |
| C | 2.462729 | 2.817812 | -1.950944 | H | 6.971500 | -1.365001 | -2.512960 |
| C | 5.597514 | 1.115082 | 0.305423 | C | -4.506263 | -3.261032 | 2.268927 |
| C | -5.814877 | -0.391481 | 0.199390 | H | -3.765843 | -3.865857 | 1.735891 |
| H | -6.678390 | -0.855325 | 0.643612 | H | -4.506932 | -3.559854 | 3.319700 |
| C | 3.303622 | 3.763268 | -1.298907 | H | -4.170844 | -2.220362 | 2.205587 |
| C | -2.131189 | -3.895695 | -2.413275 | C | -8.813972 | 1.626884 | -0.922800 |
| H | -1.244235 | -3.541068 | -2.927238 | H | -8.655071 | 2.706184 | -0.832501 |
| C | 6.441196 | -2.901418 | -0.171589 | H | -9.731797 | 1.458370 | -1.490611 |
| C | -5.428269 | 3.887033 | 0.544705 | H | -7.972545 | 1.228962 | -1.499955 |
| C | -1.771799 | 3.146298 | -3.122276 | C | 7.234875 | 0.598760 | 3.018228 |
| H | -1.155619 | 2.413791 | -3.626564 | C | 8.970139 | -3.623261 | 0.757412 |
| C | 3.015553 | -2.885547 | -1.767752 | C | -7.553238 | -2.820056 | -1.719184 |
| C | 5.830226 | -0.269531 | 0.166686 | H | -7.382644 | -1.746250 | -1.853582 |
| H | 6.715962 | -0.711311 | 0.590707 | H | -8.569146 | -3.049418 | -2.049074 |
| C | -7.817047 | 1.078898 | 1.327731 | H | -6.847456 | -3.341651 | -2.372624 |
| C | -6.511097 | 3.147982 | 1.102840 | C | 7.861868 | -3.658302 | 1.606097 |
| C | 6.347530 | 3.244097 | 1.285594 | H | 7.990525 | -3.964363 | 2.640769 |
| C | 1.739845 | 3.166469 | -3.099968 | B | -4.431368 | 3.139043 | -0.356769 |
| H | 1.177545 | 2.407263 | -3.627704 | C | 9.006509 | 1.471032 | -0.259166 |
| C | -4.447655 | -4.802555 | -1.176600 | H | 10.038402 | 1.289518 | -0.567455 |
| H | -5.353300 | -5.159911 | -0.702268 | H | 8.817718 | 2.548178 | -0.289924 |
| C | -3.467276 | 4.987333 | -1.929025 | H | 8.343766 | 1.008357 | -0.999069 |
| H | -4.176824 | 5.692093 | -1.510927 | B | -2.580028 | -1.461643 | -1.563961 |
| C | 5.277955 | 3.975670 | 0.672965 | B | 2.619692 | -1.416522 | -1.577443 |
| C | -2.465084 | -5.240685 | -2.493894 | C | -6.649831 | 0.561184 | 3.502384 |
| H | -1.835376 | -5.932701 | -3.044705 | H | -6.864334 | 0.101398 | 4.469806 |
| C | 4.280660 | -3.329933 | -1.268752 | H | -6.361455 | 1.603638 | 3.667850 |
| C | -3.625006 | -5.692690 | -1.856940 | H | -5.783558 | 0.052772 | 3.065273 |
| H | -3.900912 | -6.742213 | -1.900188 | C | 9.699442 | 0.123477 | 1.774247 |
| C | 7.525535 | 1.134902 | 1.754145 | H | 10.652999 | -0.064627 | 1.288265 |
| C | 1.757954 | 4.473948 | -3.574739 | C | 8.212700 | -0.178425 | 3.638743 |
| H | 1.191854 | 4.728833 | -4.463961 | H | 8.002505 | -0.603532 | 4.616878 |
| C | 2.226978 | -3.849840 | -2.438073 | B | 4.317425 | 3.235425 | -0.257029 |
| H | 1.287353 | -3.529922 | -2.872459 | C | 5.400778 | -3.295414 | 2.092621 |
| C | 7.529254 | -2.854929 | -1.056450 | H | 5.043987 | -2.273679 | 2.264099 |
| C | -8.890521 | 0.972485 | 0.431297 | H | 5.663562 | -3.729205 | 3.059833 |
| C | 7.275540 | 3.882251 | 2.129003 | H | 4.563342 | -3.860657 | 1.673126 |
| H | 8.085022 | 3.312941 | 2.568391 | C | -11.262860 | -1.237090 | 2.442811 |
| C | -5.345307 | 5.255176 | 0.879941 | H | -12.195487 | -0.701168 | 2.239048 |
| H | -4.495439 | 5.822321 | 0.515619 | H | -11.250375 | -1.503991 | 3.502779 |
| C | -7.353279 | -3.210382 | -0.278840 | H | -11.291138 | -2.168770 | 1.866598 |
| C | -5.875512 | -3.419711 | 1.662815 | C | 9.448001 | -0.430557 | 3.030912 |
| C | 7.151731 | 5.237346 | 2.407650 | C | 5.896197 | 0.842954 | 3.663502 |
| H | 7.873295 | 5.717054 | 3.061118 | H | 5.850956 | 0.381181 | 4.652078 |
| C | -7.838762 | 0.461787 | 2.583985 | H | 5.084065 | 0.430443 | 3.055274 |
| C | -1.843074 | 4.441843 | -3.611126 | H | 5.699755 | 1.914095 | 3.771570 |
| H | -1.263458 | 4.711997 | -4.487966 | C | -9.404284 | -4.417300 | 2.716107 |
| C | -2.684906 | 5.379804 | -3.005388 | H | -9.161216 | -5.324610 | 3.278719 |
| H | -2.751799 | 6.390476 | -3.395884 | H | -10.291117 | -4.622505 | 2.110828 |
| C | -10.003594 | 0.228172 | 0.822717 | H | -9.672003 | -3.645094 | 3.446079 |
| H | -10.841780 | 0.134684 | 0.136614 | C | 10.346272 | -3.989750 | 1.252948 |
| C | -6.963996 | -3.857265 | 2.417577 | H | 10.828943 | -4.713049 | 0.587852 |
| H | -6.812422 | -4.104756 | 3.465422 | H | 10.309177 | -4.424072 | 2.255067 |
| C | -7.485237 | 3.796463 | 1.889737 | H | 10.993606 | -3.106840 | 1.296301 |
| H | -8.316284 | 3.230580 | 2.291963 | C | 10.472761 | -1.291189 | 3.725686 |
| C | 3.850091 | -5.584515 | -2.046335 | H | 10.683903 | -0.921208 | 4.734435 |
| H | 4.167713 | -6.618174 | -2.142101 | H | 11.414814 | -1.318427 | 3.172542 |
| C | 5.183943 | 5.346743 | 1.018355 | H | 10.114776 | -2.321518 | 3.826955 |

**Supplementary Table 10.** Cartesian coordinates of **QB-U-2** at the optimized S0 geometry.

| C | 5.946228 | -1.064624 | 0.217890 |  | C | -1.925419 | 4.082382 | -1.055060 |
| --- | --- | --- | --- | --- | --- | --- | --- | --- |
| C | 6.129110 | 0.319668 | 0.172827 | C | -2.264970 | 5.425413 | -1.119750 |
| C | 5.025691 | 1.164396 | 0.327258 | C | -3.586897 | 5.803897 | -0.857736 |
| C | 3.716856 | 0.649198 | 0.510691 | C | -4.551542 | 4.850498 | -0.569107 |
| C | 3.572004 | -0.755473 | 0.590254 | C | 5.744517 | 2.960518 | -2.487893 |
| C | 4.669424 | -1.637030 | 0.458660 | C | 10.528487 | 4.056064 | -1.289016 |
| N | 7.047986 | -1.898229 | 0.034665 | C | -5.743819 | 2.960331 | 2.488002 |
| C | 8.340282 | -1.262166 | -0.030299 | C | -10.528209 | 4.055444 | 1.290447 |
| C | 6.958812 | -3.294262 | -0.073704 | C | 7.184446 | 2.924589 | 2.341813 |
| C | 5.723822 | -3.969204 | 0.137049 | C | -7.184963 | 2.924780 | -2.341353 |
| C | 5.706677 | -5.362789 | -0.079152 | B | 4.505039 | -3.129771 | 0.562426 |
| C | 6.840691 | -6.078824 | -0.432498 | B | -4.505095 | -3.129787 | -0.562173 |
| C | 8.054666 | -5.397127 | -0.577668 | B | 2.532690 | 1.576001 | 0.601217 |
| C | 8.119452 | -4.022587 | -0.406361 | B | -2.532702 | 1.575974 | -0.601323 |
| C | 8.818528 | -0.786081 | -1.256759 | H | 7.109692 | 0.732359 | 0.012081 |
| C | 10.032531 | -0.091389 | -1.264963 | H | 4.761361 | -5.885866 | 0.016320 |
| C | 10.757422 | 0.132346 | -0.092502 | H | 6.789519 | -7.150769 | -0.594336 |
| C | 10.250248 | -0.364997 | 1.113045 | H | 8.957295 | -5.940004 | -0.842660 |
| C | 9.042066 | -1.060299 | 1.167261 | H | 9.060223 | -3.504276 | -0.543319 |
| C | 8.017580 | -0.984757 | -2.516107 | H | 10.412356 | 0.290374 | -2.208932 |
| C | 12.050638 | 0.907945 | -0.109851 | H | 10.803422 | -0.198714 | 2.034108 |
| C | 8.477839 | -1.563227 | 2.469769 | H | 7.070076 | -0.437975 | -2.459315 |
| N | 2.294884 | -1.296542 | 0.798322 | H | 8.567611 | -0.626465 | -3.389212 |
| C | 1.145404 | -0.551086 | 0.412989 | H | 7.771621 | -2.040093 | -2.668298 |
| C | 2.156854 | -2.594680 | 1.369291 | H | 12.397388 | 1.085992 | -1.131008 |
| C | 1.031478 | -2.869865 | 2.167929 | H | 11.927900 | 1.883283 | 0.374193 |
| C | 0.874199 | -4.115284 | 2.756417 | H | 12.841894 | 0.376271 | 0.428636 |
| C | 1.848186 | -5.105559 | 2.589129 | H | 9.149941 | -1.336117 | 3.300337 |
| C | 2.982179 | -4.815480 | 1.846474 | H | 7.505766 | -1.102982 | 2.676579 |
| C | 3.176086 | -3.568728 | 1.214200 | H | 8.317055 | -2.645620 | 2.440216 |
| C | 1.180170 | 0.869875 | 0.389699 | H | 0.291424 | -2.099571 | 2.342220 |
| C | -0.000006 | 1.515024 | -0.000055 | H | -0.000020 | -4.303788 | 3.372104 |
| C | -1.180185 | 0.869851 | -0.389766 | H | 1.732322 | -6.075256 | 3.062966 |
| C | -1.145431 | -0.551112 | -0.412941 | H | 3.771692 | -5.555224 | 1.781393 |
| C | -0.000018 | -1.236991 | 0.000059 | H | -0.000006 | 2.594905 | -0.000090 |
| N | -2.294916 | -1.296593 | -0.798209 | H | -0.000022 | -2.315518 | 0.000113 |
| C | -3.572030 | -0.755498 | -0.590209 | H | -3.771689 | -5.555421 | -1.780725 |
| C | -2.156886 | -2.594800 | -1.369036 | H | -1.732306 | -6.075610 | -3.062218 |
| C | -3.176113 | -3.568832 | -1.213827 | H | -0.000001 | -4.304151 | -3.371627 |
| C | -2.982187 | -4.815675 | -1.845915 | H | -0.291470 | -2.099797 | -2.342044 |
| C | -1.848187 | -5.105843 | -2.588525 | H | -7.109701 | 0.732406 | -0.012107 |
| C | -0.874218 | -4.115575 | -2.755962 | H | -9.060388 | -3.504135 | 0.543135 |
| C | -1.031513 | -2.870077 | -2.167645 | H | -8.957509 | -5.939841 | 0.842764 |
| C | -3.716872 | 0.649182 | -0.510715 | H | -6.789706 | -7.150639 | 0.594847 |
| C | -5.025698 | 1.164400 | -0.327296 | H | -4.761471 | -5.885817 | -0.015736 |
| C | -6.129129 | 0.319696 | -0.172859 | H | -10.802926 | -0.198790 | -2.035357 |
| C | -5.946274 | -1.064596 | -0.217907 | H | -10.412871 | 0.290969 | 2.207699 |
| C | -4.669471 | -1.637032 | -0.458594 | H | -8.568397 | -0.625630 | 3.388558 |
| N | -7.048069 | -1.898175 | -0.034734 | H | -7.772624 | -2.039669 | 2.668209 |
| C | -8.340371 | -1.262079 | 0.029834 | H | -7.070610 | -0.437791 | 2.458938 |
| C | -6.958914 | -3.294189 | 0.073784 | H | -7.505341 | -1.103078 | -2.677042 |
| C | -8.119604 | -4.022474 | 0.406367 | H | -8.316251 | -2.645861 | -2.440345 |
| C | -8.054845 | -5.396994 | 0.577831 | H | -9.149372 | -1.336821 | -3.300948 |
| C | -6.840853 | -6.078712 | 0.432883 | H | -11.926875 | 1.884484 | -0.374587 |
| C | -5.706795 | -5.362725 | 0.079585 | H | -12.841188 | 0.377785 | -0.432102 |
| C | -5.723906 | -3.969162 | -0.136769 | H | -12.398363 | 1.085376 | 1.129013 |
| C | -9.041846 | -1.060359 | -1.167939 | H | 5.575056 | 5.154472 | 0.388686 |
| C | -10.249984 | -0.364954 | -1.114135 | H | 3.872610 | 6.851216 | 0.893177 |
| C | -10.757403 | 0.132653 | 0.091210 | H | 1.517649 | 6.171549 | 1.369897 |
| C | -10.032840 | -0.090972 | 1.263884 | H | 0.905862 | 3.789315 | 1.278699 |
| C | -8.818891 | -0.785773 | 1.256095 | H | 9.578602 | 3.643112 | 1.240755 |
| C | -8.018269 | -0.984309 | 2.515673 | H | 8.354037 | 3.669948 | -2.869664 |
| C | -8.477322 | -1.563523 | -2.470227 | H | -8.353266 | 3.669663 | 2.870477 |
| C | -12.050452 | 0.908540 | 0.108040 | H | -9.578869 | 3.643072 | -1.239634 |
| N | 5.219542 | 2.543429 | 0.276534 | H | -0.905928 | 3.789247 | -1.279152 |
| C | 4.207267 | 3.483730 | 0.525026 | H | -1.517725 | 6.171471 | -1.370469 |
| C | 6.536124 | 3.000060 | -0.093529 | H | -3.872642 | 6.851176 | -0.893596 |
| N | -5.219533 | 2.543443 | -0.276579 | H | -5.575050 | 5.154455 | -0.388842 |
| C | -6.536020 | 3.000072 | 0.093832 | H | 6.124751 | 3.150466 | -3.494113 |
| C | -4.207264 | 3.483715 | -0.525169 | H | 5.369146 | 1.932337 | -2.449150 |
| C | 4.551538 | 4.850516 | 0.568892 | H | 4.887552 | 3.618332 | -2.311370 |
| C | 3.586867 | 5.803935 | 0.857376 | H | 11.162095 | 4.292217 | -0.430277 |
| C | 2.264918 | 5.425473 | 1.119304 | H | 10.995751 | 3.224806 | -1.828629 |
| C | 1.925374 | 4.082435 | 1.054684 | H | 10.532636 | 4.921019 | -1.960417 |
| C | 2.860137 | 3.075419 | 0.734235 | H | -5.368751 | 1.932031 | 2.449333 |
| C | 7.515234 | 3.165472 | 0.892834 | H | -4.886720 | 3.617865 | 2.311108 |
| C | 8.806427 | 3.518105 | 0.486259 | H | -6.123705 | 3.150557 | 3.494300 |
| C | 9.126947 | 3.700398 | -0.860604 | H | -10.532273 | 4.919366 | 1.963167 |
| C | 8.119502 | 3.531750 | -1.817076 | H | -11.161721 | 4.292969 | 0.432015 |
| C | 6.819561 | 3.177532 | -1.455927 | H | -10.995644 | 3.223430 | 1.828757 |
| C | -6.819117 | 3.177429 | 1.456319 | H | 6.926556 | 1.872920 | 2.507677 |
| C | -8.118989 | 3.531534 | 1.817823 | H | 8.032872 | 3.174277 | 2.982965 |
| C | -9.126700 | 3.700157 | 0.861623 | H | 6.322447 | 3.520446 | 2.656871 |
| C | -8.806504 | 3.518035 | -0.485337 | H | -8.033445 | 3.174820 | -2.982293 |
| C | -7.515385 | 3.165533 | -0.892268 | H | -6.322844 | 3.520416 | -2.656493 |
| C | -2.860149 | 3.075387 | -0.734447 | H | -6.927438 | 1.873054 | -2.507430 |

**Supplementary Table 11.** Cartesian coordinates of **QB-U-2** at the optimized S1 geometry.

| C | -5.939692 | 1.081604 | 0.224910 |  | C | 1.987486 | -4.156039 | -0.962712 |
| --- | --- | --- | --- | --- | --- | --- | --- | --- |
| C | -6.142233 | -0.307257 | 0.193356 | C | 2.352833 | -5.492973 | -1.017286 |
| C | -5.052588 | -1.177123 | 0.340242 | C | 3.688064 | -5.848106 | -0.794969 |
| C | -3.737465 | -0.681697 | 0.512807 | C | 4.642304 | -4.867911 | -0.550191 |
| C | -3.584277 | 0.720663 | 0.590491 | C | -5.818925 | -2.957706 | -2.472426 |
| C | -4.656469 | 1.628706 | 0.458439 | C | -10.612571 | -3.986407 | -1.253119 |
| N | -7.029220 | 1.923892 | 0.030701 | C | 5.818312 | -2.957542 | 2.472578 |
| C | -8.330727 | 1.303684 | -0.041562 | C | 10.612141 | -3.986469 | 1.254150 |
| C | -6.923399 | 3.317837 | -0.068647 | C | -7.236849 | -2.900640 | 2.363845 |
| C | -5.673921 | 3.974072 | 0.154702 | C | 7.237031 | -2.900838 | -2.363426 |
| C | -5.647859 | 5.373169 | -0.044312 | B | -4.468214 | 3.119768 | 0.565559 |
| C | -6.774568 | 6.101151 | -0.391072 | B | 4.468424 | 3.119710 | -0.565748 |
| C | -7.998608 | 5.435845 | -0.553790 | B | -2.556524 | -1.630142 | 0.575047 |
| C | -8.075387 | 4.060247 | -0.400238 | B | 2.556543 | -1.630011 | -0.575830 |
| C | -8.802055 | 0.823240 | -1.268698 | H | -7.131736 | -0.704588 | 0.045388 |
| C | -10.026676 | 0.147461 | -1.282044 | H | -4.699250 | 5.888677 | 0.058311 |
| C | -10.767423 | -0.052280 | -0.115344 | H | -6.712282 | 7.174927 | -0.537651 |
| C | -10.264902 | 0.448984 | 1.090604 | H | -8.893040 | 5.992197 | -0.816958 |
| C | -9.046681 | 1.125685 | 1.151486 | H | -9.019458 | 3.551097 | -0.548394 |
| C | -7.985191 | 0.993511 | -2.522045 | H | -10.402181 | -0.238411 | -2.225924 |
| C | -12.073589 | -0.805364 | -0.138514 | H | -10.830125 | 0.300762 | 2.007315 |
| C | -8.490610 | 1.635106 | 2.455050 | H | -7.065717 | 0.400271 | -2.466920 |
| N | -2.288766 | 1.237159 | 0.790380 | H | -8.547115 | 0.668782 | -3.400549 |
| C | -1.154979 | 0.479837 | 0.401631 | H | -7.687414 | 2.036538 | -2.664422 |
| C | -2.128557 | 2.525652 | 1.377016 | H | -12.407796 | -0.996580 | -1.161350 |
| C | -1.002911 | 2.761836 | 2.187946 | H | -11.975114 | -1.773108 | 0.365559 |
| C | -0.809309 | 4.002045 | 2.779638 | H | -12.863108 | -0.249627 | 0.377746 |
| C | -1.752830 | 5.018185 | 2.603263 | H | -9.171556 | 1.417965 | 3.280884 |
| C | -2.894492 | 4.763325 | 1.853410 | H | -7.522972 | 1.171938 | 2.675348 |
| C | -3.125781 | 3.526555 | 1.219584 | H | -8.324159 | 2.716442 | 2.418581 |
| C | -1.199616 | -0.939631 | 0.360195 | H | -0.291912 | 1.965338 | 2.366068 |
| C | -0.000058 | -1.580680 | -0.000588 | H | 0.066308 | 4.164955 | 3.400120 |
| C | 1.199690 | -0.939561 | -0.361107 | H | -1.611380 | 5.985432 | 3.075458 |
| C | 1.155033 | 0.479895 | -0.402033 | H | -3.657918 | 5.529643 | 1.785112 |
| C | 0.000132 | 1.167920 | 0.000005 | H | -0.000097 | -2.659803 | -0.000838 |
| N | 2.288875 | 1.237340 | -0.790737 | H | 0.000191 | 2.246092 | 0.000215 |
| C | 3.584327 | 0.720772 | -0.590689 | H | 3.658664 | 5.529509 | -1.785585 |
| C | 2.128678 | 2.525851 | -1.377107 | H | 1.612007 | 5.985759 | -3.075634 |
| C | 3.126048 | 3.526610 | -1.219848 | H | -0.066202 | 4.165678 | -3.399768 |
| C | 2.895011 | 4.763403 | -1.853715 | H | 0.291609 | 1.966066 | -2.365740 |
| C | 1.753300 | 5.018527 | -2.603367 | H | 7.131738 | -0.704609 | -0.044938 |
| C | 0.809487 | 4.002590 | -2.779429 | H | 9.019579 | 3.551217 | 0.548505 |
| C | 1.002848 | 2.762374 | -2.187747 | H | 8.892968 | 5.992228 | 0.817273 |
| C | 3.737503 | -0.681546 | -0.513084 | H | 6.712181 | 7.174906 | 0.538068 |
| C | 5.052629 | -1.176993 | -0.340211 | H | 4.699257 | 5.888537 | -0.058198 |
| C | 6.142289 | -0.307231 | -0.193118 | H | 10.830228 | 0.300569 | -2.007167 |
| C | 5.939825 | 1.081568 | -0.224821 | H | 10.402001 | -0.238870 | 2.226009 |
| C | 4.656619 | 1.628731 | -0.458517 | H | 8.546815 | 0.668148 | 3.400562 |
| N | 7.029376 | 1.923915 | -0.030628 | H | 7.687555 | 2.036301 | 2.664662 |
| C | 8.330843 | 1.303653 | 0.041660 | H | 7.065466 | 0.400241 | 2.466659 |
| C | 6.923521 | 3.317802 | 0.068703 | H | 7.523183 | 1.172085 | -2.675247 |
| C | 8.075477 | 4.060306 | 0.400357 | H | 8.324500 | 2.716519 | -2.418423 |
| C | 7.998568 | 5.435852 | 0.554027 | H | 9.171803 | 1.417996 | -3.280746 |
| C | 6.774525 | 6.101154 | 0.391367 | H | 11.974729 | -1.773715 | -0.365274 |
| C | 5.647903 | 5.373104 | 0.044460 | H | 12.862997 | -0.250393 | -0.377773 |
| C | 5.674112 | 3.974066 | -0.154671 | H | 12.407680 | -0.997036 | 1.161476 |
| C | 9.046835 | 1.125634 | -1.151362 | H | -5.677012 | -5.148962 | 0.396834 |
| C | 10.264982 | 0.448801 | -1.090471 | H | -3.992026 | -6.890194 | 0.824708 |
| C | 10.767382 | -0.052610 | 0.115464 | H | -1.610245 | -6.255542 | 1.230734 |
| C | 10.026599 | 0.147134 | 1.282142 | H | -0.955893 | -3.889227 | 1.160332 |
| C | 8.802049 | 0.823042 | 1.268776 | H | -9.647747 | -3.579969 | 1.272775 |
| C | 7.985083 | 0.993231 | 2.522066 | H | -8.442088 | -3.620782 | -2.843199 |
| C | 8.490855 | 1.635167 | -2.454920 | H | 8.441383 | -3.620763 | 2.843845 |
| C | 12.073423 | -0.805909 | 0.138638 | H | 9.647730 | -3.580219 | -1.271930 |
| N | -5.275745 | -2.548365 | 0.289664 | H | 0.956055 | -3.889079 | -1.161817 |
| C | -4.271562 | -3.511507 | 0.509945 | H | 1.610362 | -6.255429 | -1.232023 |
| C | -6.602041 | -2.979329 | -0.074599 | H | 3.991990 | -6.890123 | -0.825186 |
| N | 5.275637 | -2.548285 | -0.289600 | H | 5.676845 | -5.148893 | -0.396706 |
| C | 6.601817 | -2.979342 | 0.074903 | H | -6.208272 | -3.134902 | -3.477482 |
| C | 4.271466 | -3.511433 | -0.510245 | H | -5.415189 | -1.940363 | -2.433075 |
| C | -4.642414 | -4.868002 | 0.549971 | H | -4.978896 | -3.638031 | -2.300251 |
| C | -3.688114 | -5.848177 | 0.794402 | H | -11.256632 | -4.170409 | -0.389474 |
| C | -2.352766 | -5.493059 | 1.016275 | H | -11.058926 | -3.172377 | -1.834844 |
| C | -1.987400 | -4.156164 | 0.961605 | H | -10.630134 | -4.881656 | -1.883630 |
| C | -2.910699 | -3.120912 | 0.686498 | H | 5.414741 | -1.940136 | 2.433133 |
| C | -7.579115 | -3.131387 | 0.915786 | H | 4.978217 | -3.637742 | 2.300234 |
| C | -8.877567 | -3.464143 | 0.514748 | H | 6.207442 | -3.134792 | 3.477712 |
| C | -9.206450 | -3.641675 | -0.830619 | H | 10.629575 | -4.881428 | 1.885075 |
| C | -8.201086 | -3.485721 | -1.791635 | H | 11.256242 | -4.170931 | 0.390630 |
| C | -6.894297 | -3.151807 | -1.436269 | H | 11.058549 | -3.172215 | 1.835524 |
| C | 6.893850 | -3.151788 | 1.436623 | H | -6.978211 | -1.850223 | 2.537915 |
| C | 8.200563 | -3.485745 | 1.792233 | H | -8.079740 | -3.155885 | 3.010127 |
| C | 9.206085 | -3.641775 | 0.831396 | H | -6.371471 | -3.497974 | 2.665862 |
| C | 8.877430 | -3.464314 | -0.514036 | H | 8.080031 | -3.156103 | -3.009563 |
| C | 7.579060 | -3.131518 | -0.915302 | H | 6.371705 | -3.498194 | -2.665549 |
| C | 2.910694 | -3.120824 | -0.687252 | H | 6.978406 | -1.850430 | -2.537561 |

**Supplementary Table 12.** Cartesian coordinates of **QB-J-1** at the optimized S0 geometry.

| C | -5.490841 | -1.120808 | 0.108219 |  | H | -1.174954 | 3.982478 | -2.201946 |
| --- | --- | --- | --- | --- | --- | --- | --- | --- |
| C | -5.796311 | 0.240998 | 0.057668 | H | 4.158340 | 7.146574 | -2.489572 |
| C | -4.818482 | 1.151220 | -0.355939 | H | 1.881491 | 6.264988 | -3.015285 |
| C | -3.514725 | 0.725324 | -0.718339 | H | 1.233121 | 4.037674 | -2.183578 |
| C | -3.254150 | -0.664263 | -0.701913 | H | 5.694380 | 5.845022 | -1.093022 |
| C | -4.222006 | -1.612481 | -0.297428 | H | 9.271504 | 3.803070 | 2.257585 |
| N | -6.461556 | -2.014763 | 0.557169 | H | 8.752184 | 6.058625 | 3.102435 |
| C | -6.217621 | -3.376370 | 0.788579 | H | 6.526775 | 7.070014 | 2.593735 |
| C | -4.969726 | -3.967650 | 0.443584 | H | 4.911340 | 5.862235 | 1.200348 |
| C | -4.778666 | -5.318937 | 0.800118 | H | 5.064890 | -1.784787 | 0.058775 |
| C | -5.764762 | -6.078737 | 1.411354 | H | 9.686595 | -2.158289 | 0.842384 |
| C | -7.004041 | -5.487676 | 1.684130 | H | 11.956318 | -1.241911 | 1.071090 |
| C | -7.232792 | -4.153607 | 1.383600 | H | 12.323902 | 1.226118 | 1.074498 |
| N | -1.984407 | -1.118748 | -1.086690 | H | 10.383263 | 2.738565 | 0.906094 |
| C | -0.863703 | -0.248820 | -0.987424 | H | 7.014382 | -4.880296 | -1.452672 |
| C | -1.809075 | -2.463855 | -1.527961 | H | 6.340240 | -4.648971 | 2.776440 |
| C | -0.804837 | -2.746464 | -2.473147 | H | 8.611432 | -1.720767 | -1.808218 |
| C | -0.596861 | -4.042897 | -2.916066 | H | 7.731378 | -2.984552 | -2.690923 |
| C | -1.412318 | -5.084702 | -2.460785 | H | 6.890992 | -1.527423 | -2.130834 |
| C | -2.445569 | -4.794716 | -1.583152 | H | 6.623992 | -2.609363 | 3.959464 |
| C | -2.677853 | -3.493938 | -1.085774 | H | 7.826073 | -1.487420 | 3.291979 |
| C | -1.020465 | 1.164028 | -1.056724 | H | 6.113949 | -1.204694 | 3.004407 |
| C | 0.149052 | 1.928583 | -0.921241 | H | 6.284526 | -6.831216 | -0.308136 |
| C | 1.441498 | 1.406563 | -0.769989 | H | 6.893289 | -6.967725 | 1.348236 |
| C | 1.532733 | -0.010997 | -0.657659 | H | 5.215806 | -6.503727 | 1.061152 |
| C | 0.387833 | -0.808967 | -0.734868 | B | 7.643337 | 2.076393 | 0.751685 |
| N | -5.132442 | 2.508466 | -0.387351 | C | 2.810598 | -2.087263 | -0.552927 |
| C | -4.268614 | 3.497432 | -0.883516 | C | 2.983279 | -2.656859 | -1.822948 |
| C | -4.745464 | 4.819903 | -0.991083 | C | 2.689627 | -2.872526 | 0.599189 |
| C | -3.935384 | 5.812098 | -1.522679 | C | 3.009278 | -4.047794 | -1.922511 |
| C | -2.642058 | 5.515513 | -1.968319 | C | 2.724101 | -4.263068 | 0.453629 |
| C | -2.169156 | 4.218289 | -1.839650 | C | 2.869910 | -4.866791 | -0.796930 |
| C | -2.939201 | 3.179320 | -1.277504 | H | 3.136346 | -4.503037 | -2.901649 |
| B | -3.926313 | -3.088395 | -0.271108 | H | 2.623222 | -4.885720 | 1.338561 |
| B | -2.450751 | 1.732434 | -1.076312 | C | -6.406159 | 2.893496 | 0.167803 |
| C | 3.828378 | 6.197926 | -2.076761 | C | -6.473087 | 3.182567 | 1.538933 |
| C | 2.555649 | 5.700766 | -2.378488 | C | -7.547759 | 2.882403 | -0.641886 |
| C | 2.187191 | 4.457926 | -1.888472 | C | -7.722145 | 3.466089 | 2.091523 |
| C | 3.031222 | 3.686622 | -1.061344 | C | -8.780407 | 3.169434 | -0.046090 |
| C | 4.302464 | 4.229375 | -0.740278 | C | -8.886920 | 3.457948 | 1.316067 |
| C | 4.697227 | 5.468145 | -1.279993 | H | -7.789281 | 3.689204 | 3.153473 |
| N | 5.232735 | 3.494026 | 0.049059 | H | -9.676257 | 3.157501 | -0.661275 |
| C | 5.187740 | 2.094136 | 0.056654 | C | -7.781635 | -1.480479 | 0.782674 |
| C | 6.208540 | 4.173300 | 0.834260 | C | -8.684391 | -1.466513 | -0.290597 |
| C | 7.448997 | 3.557810 | 1.144131 | C | -8.098255 | -0.912990 | 2.022690 |
| C | 8.340273 | 4.276693 | 1.968970 | C | -9.929077 | -0.867189 | -0.096146 |
| C | 8.044146 | 5.536292 | 2.466681 | C | -9.356001 | -0.319953 | 2.173074 |
| C | 6.800165 | 6.106133 | 2.174950 | C | -10.279413 | -0.282942 | 1.125999 |
| C | 5.887034 | 5.429708 | 1.380405 | H | -10.637798 | -0.846819 | -0.920328 |
| C | 3.971396 | 1.449237 | -0.261747 | H | -9.612757 | 0.130972 | 3.127971 |
| C | 3.952869 | 0.030585 | -0.208188 | C | -10.224734 | 3.739472 | 1.952670 |
| C | 5.104562 | -0.709256 | 0.061986 | H | -11.010585 | 3.850848 | 1.201179 |
| C | 6.302507 | -0.040136 | 0.333143 | H | -10.518599 | 2.923705 | 2.622583 |
| C | 6.364703 | 1.376749 | 0.377726 | H | -10.196530 | 4.655850 | 2.551210 |
| N | 7.452535 | -0.786803 | 0.578778 | C | -11.620316 | 0.387136 | 1.290879 |
| C | 8.723811 | -0.223737 | 0.758639 | H | -12.432292 | -0.249952 | 0.925742 |
| C | 9.833913 | -1.085680 | 0.869647 | H | -11.822683 | 0.626501 | 2.338014 |
| C | 11.112005 | -0.562986 | 0.994771 | H | -11.661670 | 1.323115 | 0.722549 |
| C | 11.319321 | 0.821579 | 1.003503 | C | -7.088416 | -0.909134 | 3.139464 |
| C | 10.222402 | 1.666050 | 0.919153 | H | -6.720916 | -1.918814 | 3.346535 |
| C | 8.899237 | 1.187377 | 0.820740 | H | -6.219619 | -0.298751 | 2.870079 |
| N | 2.762517 | -0.649341 | -0.449116 | H | -7.521505 | -0.502072 | 4.055936 |
| B | 2.742614 | 2.222151 | -0.667794 | C | -8.293023 | -2.062181 | -1.617197 |
| C | 7.284888 | -2.218482 | 0.618320 | H | -8.018998 | -3.116794 | -1.512598 |
| C | 7.330640 | -2.947203 | -0.575871 | H | -9.112070 | -1.987331 | -2.336020 |
| C | 7.003047 | -4.305988 | -0.530243 | H | -7.420713 | -1.546778 | -2.033151 |
| C | 6.634688 | -4.931741 | 0.662364 | C | -5.224730 | 3.156190 | 2.380751 |
| C | 6.623543 | -4.175149 | 1.839833 | H | -4.477489 | 3.861512 | 2.003364 |
| C | 6.940959 | -2.816724 | 1.839407 | H | -5.448146 | 3.411943 | 3.418918 |
| C | 7.662628 | -2.261750 | -1.874809 | H | -4.762543 | 2.163439 | 2.361628 |
| C | 6.873204 | -1.988958 | 3.095672 | C | -7.442550 | 2.527020 | -2.101260 |
| C | 6.239063 | -6.386489 | 0.689088 | H | -6.705888 | 3.155504 | -2.610866 |
| H | -6.772416 | 0.588585 | 0.347638 | H | -7.117331 | 1.487900 | -2.221784 |
| H | -3.812024 | -5.770196 | 0.605077 | H | -8.406065 | 2.644482 | -2.602352 |
| H | -5.580370 | -7.115376 | 1.674589 | C | 2.534429 | -2.225700 | 1.949789 |
| H | -7.794803 | -6.067751 | 2.150891 | H | 2.380869 | -2.977452 | 2.727122 |
| H | -8.187782 | -3.701841 | 1.620870 | H | 3.425782 | -1.642713 | 2.205209 |
| H | -0.192909 | -1.945841 | -2.865960 | H | 1.684646 | -1.536104 | 1.961852 |
| H | 0.190007 | -4.234865 | -3.638700 | C | 2.842476 | -6.366925 | -0.946682 |
| H | -1.262332 | -6.098013 | -2.820573 | H | 2.913227 | -6.868284 | 0.021852 |
| H | -3.128489 | -5.585881 | -1.296686 | H | 1.908272 | -6.690572 | -1.420501 |
| H | 0.039715 | 3.004882 | -0.888350 | H | 3.666649 | -6.722184 | -1.573638 |
| H | 0.476500 | -1.873464 | -0.590010 | C | 3.138175 | -1.776519 | -3.034679 |
| H | -5.751546 | 5.058077 | -0.669242 | H | 2.262977 | -1.133193 | -3.172831 |
| H | -4.322427 | 6.823635 | -1.604069 | H | 4.003166 | -1.113402 | -2.928471 |
| H | -2.019964 | 6.289356 | -2.406505 | H | 3.271880 | -2.375472 | -3.938342 |

**Supplementary Table 13.** Cartesian coordinates of **QB-J-1** at the optimized S1 geometry.

| C | -5.498048 | -1.132839 | 0.130399 |  | H | -1.153588 | 4.032930 | -2.027163 |
| --- | --- | --- | --- | --- | --- | --- | --- | --- |
| C | -5.821750 | 0.228247 | 0.035184 | H | 4.178281 | 7.186389 | -2.393854 |
| C | -4.844343 | 1.149640 | -0.373196 | H | 1.857961 | 6.362932 | -2.817011 |
| C | -3.531417 | 0.736717 | -0.693506 | H | 1.192199 | 4.140534 | -1.995975 |
| C | -3.266693 | -0.648550 | -0.654090 | H | 5.742605 | 5.820317 | -1.075033 |
| C | -4.217919 | -1.608597 | -0.242326 | H | 9.315811 | 3.777924 | 2.269290 |
| N | -6.462572 | -2.020442 | 0.597119 | H | 8.803990 | 6.027257 | 3.132067 |
| C | -6.207050 | -3.374810 | 0.861916 | H | 6.578249 | 7.048400 | 2.642428 |
| C | -4.942414 | -3.955983 | 0.537227 | H | 4.953258 | 5.855128 | 1.246366 |
| C | -4.750881 | -5.305926 | 0.918229 | H | 5.090834 | -1.776453 | 0.014448 |
| C | -5.739857 | -6.060731 | 1.526307 | H | 9.722617 | -2.178532 | 0.763275 |
| C | -6.989192 | -5.477349 | 1.782544 | H | 11.993290 | -1.265220 | 1.001205 |
| C | -7.221173 | -4.147810 | 1.460218 | H | 12.360109 | 1.202430 | 1.043847 |
| N | -1.971874 | -1.090118 | -0.996373 | H | 10.421381 | 2.719125 | 0.906755 |
| C | -0.864352 | -0.229809 | -0.883378 | H | 7.000607 | -4.852439 | -1.569176 |
| C | -1.790598 | -2.444381 | -1.439413 | H | 6.344753 | -4.682178 | 2.665478 |
| C | -0.809747 | -2.707910 | -2.408538 | H | 8.637225 | -1.707955 | -1.882100 |
| C | -0.574905 | -4.005949 | -2.843175 | H | 7.738590 | -2.947757 | -2.779215 |
| C | -1.350763 | -5.058103 | -2.349233 | H | 6.917883 | -1.490265 | -2.193508 |
| C | -2.375079 | -4.783157 | -1.451839 | H | 6.654124 | -2.667008 | 3.880479 |
| C | -2.635914 | -3.483357 | -0.969114 | H | 7.876350 | -1.555115 | 3.234253 |
| C | -1.021602 | 1.193639 | -0.932145 | H | 6.169747 | -1.236918 | 2.950934 |
| C | 0.143712 | 1.958307 | -0.794725 | H | 6.004124 | -6.742629 | -0.454888 |
| C | 1.455312 | 1.437123 | -0.676382 | H | 7.054255 | -7.019399 | 0.939991 |
| C | 1.544184 | 0.010669 | -0.594630 | H | 5.368237 | -6.562040 | 1.186185 |
| C | 0.403999 | -0.788960 | -0.666230 | B | 7.680442 | 2.065031 | 0.752166 |
| N | -5.181503 | 2.499123 | -0.429478 | C | 2.828021 | -2.064590 | -0.567248 |
| C | -4.310459 | 3.498219 | -0.883994 | C | 2.976439 | -2.607458 | -1.851325 |
| C | -4.802719 | 4.813117 | -1.014704 | C | 2.730979 | -2.873741 | 0.571341 |
| C | -3.980200 | 5.820217 | -1.496074 | C | 3.005011 | -3.996618 | -1.979080 |
| C | -2.657240 | 5.538812 | -1.866630 | C | 2.766536 | -4.260266 | 0.397310 |
| C | -2.169384 | 4.250129 | -1.719517 | C | 2.887943 | -4.838191 | -0.868566 |
| C | -2.952370 | 3.191121 | -1.207196 | H | 3.112669 | -4.431692 | -2.969578 |
| B | -3.901357 | -3.086329 | -0.172554 | H | 2.684277 | -4.901098 | 1.271163 |
| B | -2.459031 | 1.751621 | -0.999568 | C | -6.481253 | 2.870268 | 0.077415 |
| C | 3.845612 | 6.238965 | -1.981558 | C | -6.596150 | 3.177663 | 1.441580 |
| C | 2.550339 | 5.772517 | -2.224149 | C | -7.593108 | 2.830655 | -0.771028 |
| C | 2.169482 | 4.529434 | -1.736830 | C | -7.866984 | 3.451576 | 1.946742 |
| C | 3.028978 | 3.718699 | -0.963347 | C | -8.848650 | 3.109779 | -0.220575 |
| C | 4.319702 | 4.245734 | -0.683435 | C | -9.004583 | 3.417775 | 1.132342 |
| C | 4.729124 | 5.471994 | -1.229270 | H | -7.972875 | 3.688458 | 3.002452 |
| N | 5.260100 | 3.491729 | 0.092785 | H | -9.722966 | 3.076353 | -0.865068 |
| C | 5.219722 | 2.091565 | 0.070349 | C | -7.792713 | -1.497651 | 0.790184 |
| C | 6.240504 | 4.160074 | 0.869893 | C | -8.684868 | -1.538477 | -0.291597 |
| C | 7.485028 | 3.538827 | 1.169408 | C | -8.132038 | -0.894484 | 2.007016 |
| C | 8.381879 | 4.252479 | 1.990935 | C | -9.942437 | -0.956986 | -0.129139 |
| C | 8.090668 | 5.510196 | 2.497980 | C | -9.402285 | -0.320607 | 2.124836 |
| C | 6.846019 | 6.086400 | 2.216096 | C | -10.316282 | -0.338735 | 1.069210 |
| C | 5.928011 | 5.419308 | 1.421595 | H | -10.643706 | -0.979869 | -0.959603 |
| C | 3.996123 | 1.459948 | -0.243408 | H | -9.677302 | 0.156971 | 3.061499 |
| C | 3.977477 | 0.047145 | -0.208983 | C | -10.365319 | 3.698484 | 1.718429 |
| C | 5.135347 | -0.700688 | 0.033224 | H | -11.134595 | 3.740135 | 0.943243 |
| C | 6.342403 | -0.040724 | 0.301198 | H | -10.652740 | 2.918531 | 2.431951 |
| C | 6.403248 | 1.370994 | 0.367004 | H | -10.377275 | 4.651384 | 2.257867 |
| N | 7.493305 | -0.798992 | 0.525951 | C | -11.674283 | 0.303874 | 1.200318 |
| C | 8.759179 | -0.241709 | 0.712426 | H | -12.469354 | -0.375413 | 0.876075 |
| C | 9.871574 | -1.106748 | 0.807796 | H | -11.880765 | 0.597257 | 2.232755 |
| C | 11.148045 | -0.586286 | 0.937878 | H | -11.743360 | 1.203651 | 0.578838 |
| C | 11.355109 | 0.799903 | 0.968527 | C | -7.134861 | -0.834657 | 3.133603 |
| C | 10.259114 | 1.646878 | 0.901404 | H | -6.734928 | -1.826933 | 3.362361 |
| C | 8.935063 | 1.172158 | 0.799253 | H | -6.284063 | -0.199334 | 2.863651 |
| N | 2.780552 | -0.629182 | -0.434710 | H | -7.591731 | -0.425994 | 4.037728 |
| B | 2.746900 | 2.247227 | -0.596165 | C | -8.271740 | -2.177584 | -1.591118 |
| C | 7.317503 | -2.230909 | 0.545142 | H | -7.989176 | -3.224702 | -1.443269 |
| C | 7.349335 | -2.939842 | -0.662035 | H | -9.083024 | -2.137389 | -2.321377 |
| C | 7.004068 | -4.294161 | -0.636936 | H | -7.399013 | -1.670872 | -2.016614 |
| C | 6.633005 | -4.935051 | 0.547454 | C | -5.376665 | 3.184883 | 2.325073 |
| C | 6.634432 | -4.197701 | 1.736492 | H | -4.637079 | 3.910687 | 1.972080 |
| C | 6.969954 | -2.843297 | 1.757777 | H | -5.642422 | 3.435366 | 3.354363 |
| C | 7.681982 | -2.237132 | -1.951717 | H | -4.885741 | 2.205979 | 2.323998 |
| C | 6.914907 | -2.036009 | 3.028008 | C | -7.434866 | 2.455022 | -2.220559 |
| C | 6.243407 | -6.391548 | 0.551878 | H | -6.673914 | 3.070509 | -2.709599 |
| H | -6.808283 | 0.568239 | 0.299316 | H | -7.115060 | 1.411553 | -2.316676 |
| H | -3.779083 | -5.754557 | 0.743732 | H | -8.377504 | 2.573778 | -2.759391 |
| H | -5.551217 | -7.093093 | 1.804504 | C | 2.596440 | -2.253853 | 1.936716 |
| H | -7.779263 | -6.056997 | 2.250208 | H | 2.458326 | -3.021231 | 2.701593 |
| H | -8.181230 | -3.698131 | 1.681081 | H | 3.488656 | -1.671411 | 2.190996 |
| H | -0.226038 | -1.894130 | -2.817938 | H | 1.743873 | -1.568729 | 1.974364 |
| H | 0.201853 | -4.188362 | -3.578611 | C | 2.842797 | -6.334625 | -1.046008 |
| H | -1.181291 | -6.074119 | -2.693447 | H | 3.097664 | -6.857605 | -0.120760 |
| H | -3.028680 | -5.589925 | -1.141095 | H | 1.836186 | -6.654926 | -1.340994 |
| H | 0.033650 | 3.032911 | -0.739551 | H | 3.532877 | -6.667370 | -1.827539 |
| H | 0.499220 | -1.855464 | -0.547476 | C | 3.096428 | -1.702593 | -3.048708 |
| H | -5.828877 | 5.033100 | -0.748265 | H | 2.211042 | -1.066920 | -3.152573 |
| H | -4.374411 | 6.826890 | -1.596115 | H | 3.955866 | -1.031113 | -2.950576 |
| H | -2.021788 | 6.324267 | -2.263783 | H | 3.214921 | -2.282764 | -3.966658 |

**Supplementary Table 14.** Cartesian coordinates of **QB-J-2** at the optimized S0 geometry.

| C | 5.544086 | -1.126237 | -0.018634 |  | H | 1.054961 | 3.995904 | -1.934912 |
| --- | --- | --- | --- | --- | --- | --- | --- | --- |
| C | 5.844534 | 0.236251 | -0.082162 | H | -3.442910 | 7.220454 | 2.086256 |
| C | 4.837896 | 1.148392 | -0.414413 | H | -1.112428 | 6.352175 | 1.853219 |
| C | 3.511573 | 0.723426 | -0.683262 | H | -0.753104 | 4.101405 | 0.928144 |
| C | 3.252890 | -0.666080 | -0.656492 | H | -5.343083 | 5.876789 | 1.314773 |
| C | 4.248675 | -1.616061 | -0.331823 | H | -9.787623 | 3.766876 | -0.709871 |
| N | 6.545543 | -2.022653 | 0.351106 | H | -9.561136 | 5.992161 | -1.742253 |
| C | 6.319884 | -3.386156 | 0.589791 | H | -7.289871 | 7.002869 | -1.976914 |
| C | 5.050274 | -3.976157 | 0.333136 | H | -5.320410 | 5.826751 | -1.114757 |
| C | 4.886619 | -5.330617 | 0.691100 | H | -5.096202 | -1.782370 | 0.223228 |
| C | 5.915402 | -6.094181 | 1.221995 | H | -9.733681 | -2.147192 | 0.934272 |
| C | 7.170945 | -5.503710 | 1.408130 | H | -11.966386 | -1.222787 | 1.382008 |
| C | 7.376374 | -4.167002 | 1.102457 | H | -12.323483 | 1.246768 | 1.418112 |
| N | 1.957793 | -1.119839 | -0.948075 | H | -10.428145 | 2.749787 | 0.939365 |
| C | 0.846328 | -0.254152 | -0.751628 | H | -6.542367 | -4.705203 | 2.634175 |
| C | 1.756518 | -2.459375 | -1.394939 | H | -7.037946 | -4.835314 | -1.623674 |
| C | 0.696326 | -2.730870 | -2.279575 | H | -8.005932 | -1.541803 | 3.166803 |
| C | 0.464376 | -4.021384 | -2.728379 | H | -6.837954 | -2.690678 | 3.848554 |
| C | 1.307700 | -5.067442 | -2.338799 | H | -6.281140 | -1.270045 | 2.944583 |
| C | 2.393538 | -4.787108 | -1.523380 | H | -7.667474 | -2.897892 | -2.849682 |
| C | 2.654571 | -3.492633 | -1.024355 | H | -8.583121 | -1.653254 | -1.976020 |
| C | 1.000396 | 1.159289 | -0.817973 | H | -6.850051 | -1.459298 | -2.212532 |
| C | -0.143041 | 1.925312 | -0.545732 | H | -7.214775 | -7.003983 | 0.955764 |
| C | -1.411415 | 1.407375 | -0.251560 | H | -6.224375 | -6.781748 | -0.491721 |
| C | -1.520304 | -0.013069 | -0.246337 | H | -5.507267 | -6.590083 | 1.113988 |
| C | -0.389906 | -0.815981 | -0.433462 | B | -7.770031 | 2.074647 | 0.271346 |
| N | 5.146617 | 2.506613 | -0.455702 | C | -2.806876 | -2.085026 | -0.173346 |
| C | 4.244805 | 3.499706 | -0.869961 | C | -2.701494 | -2.882313 | 0.971352 |
| C | 4.708722 | 4.825440 | -0.992392 | C | -2.978921 | -2.640077 | -1.450054 |
| C | 3.856779 | 5.823459 | -1.441353 | C | -2.744182 | -4.270943 | 0.812666 |
| C | 2.532911 | 5.529965 | -1.788404 | C | -3.016038 | -4.029826 | -1.562581 |
| C | 2.074337 | 4.228622 | -1.647119 | C | -2.886387 | -4.860949 | -0.445174 |
| C | 2.889835 | 3.183152 | -1.166181 | H | -2.655050 | -4.903188 | 1.692101 |
| B | 3.956714 | -3.092521 | -0.295371 | H | -3.143755 | -4.474538 | -2.546340 |
| B | 2.422471 | 1.731285 | -0.951615 | C | 6.457326 | 2.888645 | 0.007752 |
| C | -3.259737 | 6.258303 | 1.617252 | C | 7.535594 | 2.889811 | -0.884468 |
| C | -1.954715 | 5.768744 | 1.494939 | C | 6.625523 | 3.161627 | 1.373556 |
| C | -1.756679 | 4.509373 | 0.950731 | C | 8.808570 | 3.173678 | -0.378532 |
| C | -2.820398 | 3.712298 | 0.475101 | C | 7.911534 | 3.442200 | 1.835230 |
| C | -4.130175 | 4.249275 | 0.573516 | C | 9.015459 | 3.446739 | 0.975200 |
| C | -4.336296 | 5.504647 | 1.175319 | H | 9.656312 | 3.171247 | -1.058598 |
| N | -5.263419 | 3.495546 | 0.151790 | H | 8.057016 | 3.652714 | 2.891905 |
| C | -5.219514 | 2.096201 | 0.178993 | C | 7.878466 | -1.488803 | 0.482314 |
| C | -6.435735 | 4.158038 | -0.313384 | C | 8.284897 | -0.928355 | 1.699155 |
| C | -7.709818 | 3.542477 | -0.205838 | C | 8.699905 | -1.467224 | -0.654290 |
| C | -8.814152 | 4.242542 | -0.737100 | C | 9.549553 | -0.334201 | 1.760176 |
| C | -8.689904 | 5.484382 | -1.340460 | C | 9.954945 | -0.867271 | -0.548213 |
| C | -7.418094 | 6.053916 | -1.464797 | C | 10.393463 | -0.289553 | 0.648306 |
| C | -6.302471 | 5.395342 | -0.970882 | H | 9.875245 | 0.111678 | 2.696232 |
| C | -3.962485 | 1.452509 | 0.123285 | H | 10.601105 | -0.840893 | -1.422148 |
| C | -3.958406 | 0.033397 | 0.099373 | C | 10.396049 | 3.726503 | 1.513722 |
| C | -5.135913 | -0.706850 | 0.215160 | H | 10.412601 | 4.644165 | 2.110843 |
| C | -6.360233 | -0.037733 | 0.316212 | H | 10.735660 | 2.911575 | 2.162653 |
| C | -6.436559 | 1.377724 | 0.255760 | H | 11.126119 | 3.835053 | 0.707579 |
| N | -7.527104 | -0.783726 | 0.465728 | C | 11.741538 | 0.382782 | 0.718054 |
| C | -8.794725 | -0.217655 | 0.664297 | H | 12.525395 | -0.249113 | 0.288213 |
| C | -9.884030 | -1.074809 | 0.922473 | H | 11.738232 | 1.323359 | 0.155812 |
| C | -11.140677 | -0.547462 | 1.177627 | H | 12.020879 | 0.614601 | 1.749057 |
| C | -11.344303 | 0.837525 | 1.190961 | C | 8.212578 | -2.054933 | -1.952357 |
| C | -10.276196 | 1.676363 | 0.910084 | H | 7.947350 | -3.110411 | -1.834702 |
| C | -8.984822 | 1.191899 | 0.614648 | H | 7.312004 | -1.537517 | -2.299928 |
| N | -2.752467 | -0.649110 | -0.043468 | H | 8.976698 | -1.974815 | -2.728786 |
| B | -2.672309 | 2.230614 | 0.064642 | C | 7.359935 | -0.932660 | 2.887146 |
| C | -7.367489 | -2.216672 | 0.493744 | H | 6.471843 | -0.324096 | 2.685063 |
| C | -7.081604 | -2.845253 | 1.714933 | H | 7.011737 | -1.944470 | 3.116098 |
| C | -6.782064 | -4.207815 | 1.697694 | H | 7.858053 | -0.528053 | 3.771090 |
| C | -6.755413 | -4.939226 | 0.504936 | C | 7.322888 | 2.550298 | -2.335842 |
| C | -7.059839 | -4.281671 | -0.688786 | H | 6.548250 | 3.181383 | -2.781951 |
| C | -7.367520 | -2.918098 | -0.717200 | H | 8.245948 | 2.677075 | -2.906056 |
| C | -7.051162 | -2.047524 | 2.991785 | H | 6.992835 | 1.511276 | -2.443413 |
| C | -7.634435 | -2.197455 | -2.012116 | C | 5.443082 | 3.121363 | 2.305178 |
| C | -6.406656 | -6.406120 | 0.518264 | H | 4.669395 | 3.830330 | 1.993581 |
| H | 6.839084 | 0.583059 | 0.137625 | H | 4.981703 | 2.128061 | 2.306540 |
| H | 3.908478 | -5.781304 | 0.563282 | H | 5.742491 | 3.363460 | 3.327366 |
| H | 5.751616 | -7.133233 | 1.489301 | C | -3.130315 | -1.749346 | -2.654380 |
| H | 7.994148 | -6.086607 | 1.810901 | H | -3.217756 | -2.340632 | -3.568705 |
| H | 8.346027 | -3.716153 | 1.272547 | H | -4.022647 | -1.120843 | -2.563476 |
| H | 0.061229 | -1.925742 | -2.623134 | H | -2.276364 | -1.072743 | -2.759556 |
| H | -0.364078 | -4.204908 | -3.405134 | C | -2.857609 | -6.359281 | -0.610090 |
| H | 1.137445 | -6.075894 | -2.703189 | H | -3.611077 | -6.698055 | -1.327773 |
| H | 3.094834 | -5.580245 | -1.291798 | H | -1.879782 | -6.686208 | -0.983724 |
| H | -0.033536 | 3.001208 | -0.554574 | H | -3.036990 | -6.871869 | 0.338479 |
| H | -0.482813 | -1.885310 | -0.335704 | C | -2.555568 | -2.245491 | 2.327841 |
| H | 5.736446 | 5.061904 | -0.746625 | H | -1.678600 | -1.591461 | 2.364619 |
| H | 4.233956 | 6.837626 | -1.535737 | H | -3.427795 | -1.625630 | 2.561599 |
| H | 1.876628 | 6.308956 | -2.162880 | H | -2.453527 | -3.004115 | 3.107029 |

**Supplementary Table 15.** Cartesian coordinates of **QB-J-2** at the optimized S1 geometry.

| C | 5.544606 | -1.133359 | 0.016184 |  | H | 1.043410 | 4.038061 | -1.790463 |
| --- | --- | --- | --- | --- | --- | --- | --- | --- |
| C | 5.860963 | 0.227531 | -0.105700 | H | -3.514010 | 7.180036 | 2.275003 |
| C | 4.856296 | 1.148383 | -0.442331 | H | -1.171962 | 6.364161 | 1.972157 |
| C | 3.524382 | 0.734299 | -0.669148 | H | -0.776052 | 4.149918 | 0.985555 |
| C | 3.263976 | -0.651344 | -0.609197 | H | -5.400093 | 5.809734 | 1.485113 |
| C | 4.241234 | -1.609997 | -0.263684 | H | -9.791922 | 3.784753 | -0.713908 |
| N | 6.538926 | -2.019983 | 0.416890 | H | -9.543056 | 6.034038 | -1.684447 |
| C | 6.303043 | -3.374955 | 0.701431 | H | -7.268345 | 7.051897 | -1.846783 |
| C | 5.019628 | -3.957321 | 0.463996 | H | -5.315635 | 5.854568 | -0.972695 |
| C | 4.856594 | -5.307911 | 0.856354 | H | -5.110895 | -1.777638 | 0.220014 |
| C | 5.885814 | -6.061339 | 1.395901 | H | -9.765899 | -2.174239 | 0.832521 |
| C | 7.148449 | -5.476256 | 1.567956 | H | -12.010848 | -1.258551 | 1.238497 |
| C | 7.355895 | -4.145844 | 1.230410 | H | -12.371771 | 1.209758 | 1.302098 |
| N | 1.947934 | -1.095506 | -0.858874 | H | -10.470641 | 2.723805 | 0.891263 |
| C | 0.850327 | -0.240323 | -0.662757 | H | -6.592010 | -4.743614 | 2.573144 |
| C | 1.744346 | -2.447950 | -1.301105 | H | -6.947548 | -4.803947 | -1.700034 |
| C | 0.714158 | -2.706504 | -2.217868 | H | -8.122764 | -1.622565 | 3.122220 |
| C | 0.459942 | -4.002230 | -2.650176 | H | -6.944487 | -2.755266 | 3.811825 |
| C | 1.263218 | -5.055504 | -2.204951 | H | -6.400377 | -1.304205 | 2.950637 |
| C | 2.333778 | -4.784447 | -1.361815 | H | -7.580837 | -2.859815 | -2.910489 |
| C | 2.618848 | -3.486847 | -0.886297 | H | -8.524454 | -1.630556 | -2.045451 |
| C | 1.004540 | 1.184449 | -0.710241 | H | -6.786256 | -1.427761 | -2.233381 |
| C | -0.140397 | 1.948342 | -0.458878 | H | -7.150088 | -7.020187 | 0.862567 |
| C | -1.431024 | 1.430679 | -0.194621 | H | -6.159966 | -6.762255 | -0.580063 |
| C | -1.534973 | 0.002668 | -0.214642 | H | -5.452051 | -6.571735 | 1.029356 |
| C | -0.407806 | -0.800018 | -0.389334 | B | -7.796141 | 2.067418 | 0.275314 |
| N | 5.186300 | 2.498959 | -0.518696 | C | -2.829620 | -2.064512 | -0.232449 |
| C | 4.281351 | 3.498486 | -0.898562 | C | -2.728386 | -2.910667 | 0.877332 |
| C | 4.759602 | 4.816221 | -1.054340 | C | -2.996420 | -2.563429 | -1.532576 |
| C | 3.900696 | 5.825492 | -1.460440 | C | -2.770597 | -4.290993 | 0.658462 |
| C | 2.553162 | 5.544651 | -1.729834 | C | -3.035671 | -3.947070 | -1.704817 |
| C | 2.080286 | 4.253179 | -1.559510 | C | -2.907610 | -4.825780 | -0.624487 |
| C | 2.903198 | 3.190997 | -1.121096 | H | -2.680837 | -4.960764 | 1.509609 |
| B | 3.931340 | -3.088884 | -0.171350 | H | -3.157487 | -4.348767 | -2.707662 |
| B | 2.430953 | 1.747506 | -0.890000 | C | 6.519754 | 2.870083 | -0.108926 |
| C | -3.318958 | 6.234442 | 1.778920 | C | 7.564111 | 2.837778 | -1.039273 |
| C | -2.009859 | 5.772193 | 1.616151 | C | 6.737462 | 3.169260 | 1.244558 |
| C | -1.789232 | 4.530672 | 1.034084 | C | 8.857300 | 3.116912 | -0.584120 |
| C | -2.840065 | 3.717497 | 0.555245 | C | 8.042384 | 3.442809 | 1.653591 |
| C | -4.155708 | 4.241936 | 0.679356 | C | 9.114936 | 3.417112 | 0.754859 |
| C | -4.385758 | 5.465563 | 1.326540 | H | 9.680202 | 3.089237 | -1.293326 |
| N | -5.285399 | 3.489366 | 0.218154 | H | 8.227760 | 3.672800 | 2.699832 |
| C | -5.242830 | 2.089624 | 0.232682 | C | 7.878410 | -1.496328 | 0.521165 |
| C | -6.445102 | 4.160454 | -0.246301 | C | 8.296582 | -0.891098 | 1.712176 |
| C | -7.724619 | 3.541575 | -0.179282 | C | 8.698478 | -1.539540 | -0.616149 |
| C | -8.816621 | 4.257486 | -0.711704 | C | 9.572205 | -0.318065 | 1.746290 |
| C | -8.679660 | 5.515393 | -1.279765 | C | 9.964523 | -0.959149 | -0.536675 |
| C | -7.405382 | 6.089611 | -1.362934 | C | 10.416067 | -0.339527 | 0.633900 |
| C | -6.300465 | 5.420158 | -0.863237 | H | 9.907709 | 0.161221 | 2.662154 |
| C | -3.981223 | 1.456686 | 0.174211 | H | 10.610378 | -0.984146 | -1.410900 |
| C | -3.976431 | 0.044447 | 0.122642 | C | 10.515172 | 3.700880 | 1.237209 |
| C | -5.156237 | -0.701776 | 0.227572 | H | 10.570601 | 4.666273 | 1.751409 |
| C | -6.388319 | -0.040355 | 0.325330 | H | 10.847443 | 2.936043 | 1.947429 |
| C | -6.463239 | 1.371475 | 0.284117 | H | 11.228097 | 3.718976 | 0.409110 |
| N | -7.555473 | -0.797401 | 0.442662 | C | 11.781529 | 0.299349 | 0.676362 |
| C | -8.822952 | -0.238540 | 0.615374 | H | 12.554815 | -0.390008 | 0.321782 |
| C | -9.919198 | -1.102240 | 0.833383 | H | 11.819522 | 1.186482 | 0.034431 |
| C | -11.180579 | -0.580461 | 1.064715 | H | 12.046485 | 0.611317 | 1.689809 |
| C | -11.386333 | 0.805995 | 1.093328 | C | 8.201322 | -2.180170 | -1.885140 |
| C | -10.314406 | 1.651504 | 0.850808 | H | 7.928385 | -3.226885 | -1.717718 |
| C | -9.014833 | 1.175415 | 0.579465 | H | 7.303079 | -1.673374 | -2.253561 |
| N | -2.771523 | -0.635219 | -0.043697 | H | 8.963437 | -2.141449 | -2.666689 |
| B | -2.683942 | 2.244403 | 0.118108 | C | 7.375053 | -0.829674 | 2.901291 |
| C | -7.386039 | -2.230424 | 0.451247 | H | 6.504388 | -0.201250 | 2.683884 |
| C | -7.129706 | -2.875538 | 1.670460 | H | 6.997227 | -1.822939 | 3.161430 |
| C | -6.809768 | -4.233141 | 1.638433 | H | 7.887749 | -0.412778 | 3.771094 |
| C | -6.732184 | -4.942066 | 0.434251 | C | 7.297271 | 2.469477 | -2.474732 |
| C | -7.009690 | -4.268122 | -0.756793 | H | 6.498521 | 3.083893 | -2.900764 |
| C | -7.338032 | -2.909194 | -0.771779 | H | 8.195480 | 2.595727 | -3.083271 |
| C | -7.151483 | -2.101193 | 2.962001 | H | 6.975646 | 1.425002 | -2.552262 |
| C | -7.573085 | -2.170882 | -2.063008 | C | 5.588524 | 3.168114 | 2.218047 |
| C | -6.353757 | -6.401424 | 0.432939 | H | 4.824279 | 3.896357 | 1.928115 |
| H | 6.864048 | 0.567854 | 0.085890 | H | 5.099148 | 2.188863 | 2.245901 |
| H | 3.875802 | -5.757957 | 0.747657 | H | 5.931505 | 3.410273 | 3.226281 |
| H | 5.717902 | -7.094184 | 1.685566 | C | -3.127877 | -1.621020 | -2.699255 |
| H | 7.969188 | -6.054494 | 1.981383 | H | -3.230212 | -2.172333 | -3.636694 |
| H | 8.328115 | -3.694869 | 1.385829 | H | -4.002290 | -0.971791 | -2.583632 |
| H | 0.107988 | -1.890963 | -2.589626 | H | -2.255212 | -0.964632 | -2.776349 |
| H | -0.353954 | -4.181500 | -3.344936 | C | -2.865628 | -6.314944 | -0.854934 |
| H | 1.078137 | -6.069611 | -2.547005 | H | -3.586360 | -6.623942 | -1.618260 |
| H | 3.005207 | -5.591632 | -1.092716 | H | -1.870698 | -6.619368 | -1.201639 |
| H | -0.032654 | 3.023645 | -0.461320 | H | -3.080149 | -6.870987 | 0.061276 |
| H | -0.505738 | -1.869724 | -0.309072 | C | -2.579658 | -2.332971 | 2.259726 |
| H | 5.802905 | 5.036138 | -0.865854 | H | -1.702324 | -1.681323 | 2.320285 |
| H | 4.284285 | 6.834093 | -1.580797 | H | -3.450464 | -1.723484 | 2.524607 |
| H | 1.887707 | 6.332425 | -2.068884 | H | -2.474572 | -3.124566 | 3.004951 |

**Supplementary Table 16.** Cartesian coordinates of **QB-I-1** at the optimized S0 geometry.

| C | 11.160089 | 0.157765 | -0.448409 |  | H | -1.693352 | 6.630528 | 2.366596 |
| --- | --- | --- | --- | --- | --- | --- | --- | --- |
| C | 10.817152 | -1.199377 | -0.425081 | H | -1.004125 | 4.451479 | 1.449653 |
| C | 9.493957 | -1.592024 | -0.292937 | H | -9.716728 | 3.280979 | -1.223132 |
| C | 8.476542 | -0.623681 | -0.171034 | H | -9.608591 | 5.547107 | -2.184379 |
| C | 8.801838 | 0.761392 | -0.135014 | H | -7.440033 | 6.784361 | -2.151132 |
| C | 10.159095 | 1.106637 | -0.302779 | H | -5.464430 | 5.784951 | -1.099696 |
| N | 7.144656 | -1.055082 | -0.094494 | C | 6.846185 | -2.464010 | -0.027237 |
| C | 6.050067 | -0.193357 | -0.099720 | C | 6.582248 | -3.166745 | -1.208744 |
| C | 6.261966 | 1.208825 | -0.058335 | C | 6.698906 | -3.055377 | 1.235899 |
| B | 7.653470 | 1.769632 | 0.058743 | C | 6.143924 | -4.490513 | -1.102850 |
| C | 4.760427 | -0.734656 | -0.129915 | C | 6.262592 | -4.379091 | 1.295541 |
| C | 3.660419 | 0.122548 | -0.164604 | C | 5.966009 | -5.106742 | 0.137501 |
| C | 3.809027 | 1.533396 | -0.203104 | H | 5.917784 | -5.043216 | -2.010769 |
| C | 5.122960 | 2.047065 | -0.127564 | H | 6.131690 | -4.846663 | 2.268303 |
| N | 2.383202 | -0.431121 | -0.173121 | C | 2.261114 | -1.865374 | -0.270594 |
| C | 1.209548 | 0.327857 | -0.102611 | C | 2.218610 | -2.639038 | 0.894582 |
| C | 1.238294 | 1.753516 | -0.147663 | C | 2.170983 | -2.442088 | -1.545989 |
| B | 2.604887 | 2.435982 | -0.322678 | C | 2.070011 | -4.023470 | 0.760822 |
| C | 0.000024 | -0.361046 | 0.000316 | C | 2.025250 | -3.826314 | -1.633815 |
| C | -1.209513 | 0.327852 | 0.103142 | C | 1.966713 | -4.632024 | -0.491357 |
| C | -1.238247 | 1.753511 | 0.148303 | H | 2.028367 | -4.635766 | 1.657746 |
| C | 0.000028 | 2.397947 | 0.000379 | H | 1.950299 | -4.286043 | -2.616186 |
| N | -2.383197 | -0.431109 | 0.173362 | C | -2.261201 | -1.865426 | 0.269980 |
| C | -3.660399 | 0.122585 | 0.164758 | C | -2.171689 | -2.443006 | 1.545024 |
| C | -3.808990 | 1.533428 | 0.203387 | C | -2.218259 | -2.638308 | -0.895701 |
| B | -2.604856 | 2.435986 | 0.323176 | C | -2.026123 | -3.827305 | 1.631976 |
| C | -4.760411 | -0.734604 | 0.129847 | C | -2.069795 | -4.022834 | -0.762813 |
| C | -6.050043 | -0.193285 | 0.099566 | C | -1.967084 | -4.632240 | 0.488996 |
| C | -6.261910 | 1.208903 | 0.058191 | H | -1.951704 | -4.287717 | 2.614068 |
| C | -5.122901 | 2.047125 | 0.127647 | C | -6.846183 | -2.463961 | 0.027851 |
| N | -7.144652 | -1.054992 | 0.094278 | C | -6.582796 | -3.166067 | 1.209843 |
| C | -8.476539 | -0.623563 | 0.170612 | C | -6.698233 | -3.055973 | -1.234915 |
| C | -8.801803 | 0.761515 | 0.134531 | C | -6.144394 | -4.489889 | 1.104847 |
| B | -7.653389 | 1.769739 | -0.059039 | C | -6.261790 | -4.379673 | -1.293660 |
| C | -9.493990 | -1.591888 | 0.292352 | C | -5.965845 | -5.106752 | -0.135083 |
| C | -10.817198 | -1.199216 | 0.424296 | H | -5.918638 | -5.042096 | 2.013162 |
| C | -11.160114 | 0.157932 | 0.447572 | H | -6.130252 | -4.847699 | -2.266120 |
| C | -10.159080 | 1.106784 | 0.302087 | C | 6.962515 | -2.253106 | 2.482760 |
| N | 5.306800 | 3.435386 | -0.123204 | H | 6.841329 | -2.868942 | 3.376774 |
| C | 6.483659 | 3.991126 | 0.456233 | H | 7.975551 | -1.838827 | 2.481303 |
| C | 7.692572 | 3.249265 | 0.499882 | H | 6.272046 | -1.405533 | 2.552063 |
| C | 2.953117 | 3.880990 | -0.741608 | C | 5.443497 | -6.517620 | 0.239142 |
| C | 4.312571 | 4.284406 | -0.690201 | H | 4.461249 | -6.533040 | 0.723879 |
| C | -7.692405 | 3.249401 | -0.500107 | H | 5.335894 | -6.976217 | -0.747212 |
| C | -6.483481 | 3.991229 | -0.456271 | H | 6.109978 | -7.150187 | 0.835123 |
| N | -5.306714 | 3.435446 | 0.123325 | C | 1.782433 | -6.123000 | -0.623477 |
| C | -4.312556 | 4.284431 | 0.690492 | H | 2.563108 | -6.566923 | -1.250099 |
| C | -2.953117 | 3.880985 | 0.742097 | H | 1.812867 | -6.617890 | 0.350901 |
| C | 6.407567 | 5.254086 | 1.072450 | H | 0.818847 | -6.359892 | -1.087659 |
| C | 7.525356 | 5.812686 | 1.673327 | C | 2.322515 | -1.984680 | 2.246036 |
| C | 8.738579 | 5.116418 | 1.698887 | H | 1.515362 | -1.259382 | 2.392153 |
| C | 8.799546 | 3.851271 | 1.135402 | H | 2.267712 | -2.727552 | 3.044941 |
| C | 2.038401 | 4.761917 | -1.357595 | H | 3.267290 | -1.439989 | 2.343825 |
| C | 2.423953 | 5.979304 | -1.896861 | C | -2.226461 | -1.575161 | 2.774052 |
| C | 3.776522 | 6.336195 | -1.868011 | H | -3.164107 | -1.011075 | 2.814010 |
| C | 4.712534 | 5.495616 | -1.285041 | H | -2.146712 | -2.177308 | 3.681897 |
| C | -4.712574 | 5.495645 | 1.285290 | H | -1.413565 | -0.841453 | 2.772949 |
| C | -3.776626 | 6.336192 | 1.868407 | C | -6.715986 | -2.484985 | 2.546112 |
| C | -2.424068 | 5.979271 | 1.897450 | H | -7.711526 | -2.048559 | 2.672271 |
| C | -2.038468 | 4.761882 | 1.358225 | H | -6.539513 | -3.189000 | 3.362464 |
| C | -8.799270 | 3.851458 | -1.135771 | H | -5.993056 | -1.666824 | 2.635574 |
| C | -8.738181 | 5.116613 | -1.699223 | C | -5.443927 | -6.517923 | -0.235754 |
| C | -7.524941 | 5.812844 | -1.673481 | H | -5.330182 | -6.973520 | 0.751295 |
| C | -6.407256 | 5.254196 | -1.072455 | H | -6.114248 | -7.152312 | -0.825513 |
| H | 12.193954 | 0.460894 | -0.579189 | H | -4.464815 | -6.534940 | -0.726699 |
| H | 11.587008 | -1.958826 | -0.526015 | C | -6.961149 | -2.254307 | -2.482311 |
| H | 9.237419 | -2.644214 | -0.297441 | H | -7.974127 | -1.839885 | -2.481531 |
| H | 10.421010 | 2.158458 | -0.340069 | H | -6.270524 | -1.406871 | -2.551730 |
| H | 4.610437 | -1.800670 | -0.128112 | H | -6.839638 | -2.870621 | -3.375953 |
| H | 0.000031 | -1.438394 | 0.000310 | C | -2.321619 | -1.983055 | -2.246763 |
| H | 0.000031 | 3.480606 | 0.000435 | H | -2.266318 | -2.725381 | -3.046140 |
| H | -4.610419 | -1.800617 | 0.127974 | H | -3.266436 | -1.438444 | -2.344636 |
| H | -9.237471 | -2.644082 | 0.296887 | H | -1.514518 | -1.257531 | -2.392018 |
| H | -11.587084 | -1.958652 | 0.525104 | C | 2.225241 | -1.573426 | -2.774463 |
| H | -12.193992 | 0.461080 | 0.578196 | H | 1.412435 | -0.839623 | -2.772471 |
| H | -10.420982 | 2.158609 | 0.339339 | H | 3.162932 | -1.009418 | -2.814507 |
| H | 5.464765 | 5.784875 | 1.099839 | H | 2.144977 | -2.174956 | -3.682670 |
| H | 7.440545 | 6.784200 | 2.151003 | C | 6.714844 | -2.486363 | -2.545429 |
| H | 9.609071 | 5.546874 | 2.183930 | H | 5.991504 | -1.668594 | -2.635194 |
| H | 9.716998 | 3.280759 | 1.222615 | H | 7.710147 | -2.049539 | -2.672048 |
| H | 1.004038 | 4.451544 | -1.448884 | H | 6.538514 | -3.190920 | -3.361344 |
| H | 1.693182 | 6.630583 | -2.365894 | H | -2.027816 | -4.634527 | -1.660133 |
| H | 4.109323 | 7.261563 | -2.328635 | C | -1.782659 | -6.123277 | 0.620160 |
| H | 5.760630 | 5.764646 | -1.308977 | H | -1.815056 | -6.617783 | -0.354350 |
| H | -5.760667 | 5.764704 | 1.309075 | H | -0.818131 | -6.360377 | 1.082286 |
| H | -4.109472 | 7.261564 | 2.328990 | H | -2.562069 | -6.567401 | 1.248190 |

**Supplementary Table 17.** Cartesian coordinates of **QB-I-1** at the optimized S1 geometry.

| C | 11.164534 | 0.109792 | -0.461537 |  | H | -1.721715 | 6.651702 | 2.386763 |
| --- | --- | --- | --- | --- | --- | --- | --- | --- |
| C | 10.816240 | -1.245964 | -0.401771 | H | -1.006269 | 4.513061 | 1.408566 |
| C | 9.492859 | -1.630137 | -0.257743 | H | -9.747038 | 3.291660 | -1.132379 |
| C | 8.477280 | -0.653758 | -0.161169 | H | -9.649028 | 5.580098 | -2.036000 |
| C | 8.809819 | 0.734133 | -0.158854 | H | -7.483041 | 6.823005 | -1.989508 |
| C | 10.168031 | 1.067334 | -0.338716 | H | -5.497793 | 5.803588 | -0.971473 |
| N | 7.149036 | -1.075170 | -0.074461 | C | 6.837989 | -2.478373 | 0.036886 |
| C | 6.058368 | -0.200366 | -0.098097 | C | 6.567192 | -3.215551 | -1.122040 |
| C | 6.274865 | 1.197649 | -0.084176 | C | 6.685773 | -3.027675 | 1.318614 |
| B | 7.669381 | 1.755286 | 0.019723 | C | 6.117596 | -4.531517 | -0.973819 |
| C | 4.761147 | -0.729919 | -0.117813 | C | 6.238238 | -4.345075 | 1.419901 |
| C | 3.663899 | 0.136891 | -0.163153 | C | 5.935374 | -5.106649 | 0.285528 |
| C | 3.816144 | 1.540677 | -0.223845 | H | 5.886398 | -5.110739 | -1.863709 |
| C | 5.137021 | 2.040683 | -0.164685 | H | 6.104352 | -4.780685 | 2.406949 |
| N | 2.379885 | -0.410648 | -0.152642 | C | 2.254444 | -1.846123 | -0.238621 |
| C | 1.213249 | 0.349176 | -0.090623 | C | 2.210620 | -2.610395 | 0.932393 |
| C | 1.246438 | 1.782646 | -0.137835 | C | 2.164234 | -2.431195 | -1.510329 |
| B | 2.611827 | 2.455149 | -0.327826 | C | 2.066137 | -3.996274 | 0.808208 |
| C | 0.000002 | -0.339939 | 0.000030 | C | 2.021829 | -3.816357 | -1.587808 |
| C | -1.213248 | 0.349173 | 0.090676 | C | 1.966249 | -4.614144 | -0.439659 |
| C | -1.246437 | 1.782644 | 0.137894 | H | 2.024557 | -4.602031 | 1.709563 |
| C | 0.000001 | 2.428726 | 0.000034 | H | 1.946809 | -4.283068 | -2.566870 |
| N | -2.379888 | -0.410648 | 0.152677 | C | -2.254459 | -1.846129 | 0.238597 |
| C | -3.663899 | 0.136893 | 0.163183 | C | -2.164272 | -2.431259 | 1.510279 |
| C | -3.816143 | 1.540679 | 0.223877 | C | -2.210636 | -2.610348 | -0.932452 |
| B | -2.611826 | 2.455148 | 0.327872 | C | -2.021885 | -3.816427 | 1.587697 |
| C | -4.761146 | -0.729916 | 0.117833 | C | -2.066169 | -3.996233 | -0.808329 |
| C | -6.058367 | -0.200363 | 0.098101 | C | -1.966299 | -4.614161 | 0.439511 |
| C | -6.274863 | 1.197652 | 0.084174 | H | -1.946884 | -4.283184 | 2.566738 |
| C | -5.137019 | 2.040685 | 0.164700 | C | -6.837982 | -2.478372 | -0.036846 |
| N | -7.149034 | -1.075166 | 0.074454 | C | -6.567214 | -3.215514 | 1.122109 |
| C | -8.477280 | -0.653754 | 0.161134 | C | -6.685715 | -3.027707 | -1.318554 |
| C | -8.809818 | 0.734137 | 0.158805 | C | -6.117597 | -4.531479 | 0.973939 |
| B | -7.669376 | 1.755290 | -0.019748 | C | -6.238156 | -4.345103 | -1.419790 |
| C | -9.492862 | -1.630132 | 0.257687 | C | -5.935325 | -5.106644 | -0.285385 |
| C | -10.816246 | -1.245957 | 0.401682 | H | -5.886418 | -5.110673 | 1.863852 |
| C | -11.164540 | 0.109799 | 0.461434 | H | -6.104224 | -4.780735 | -2.406823 |
| C | -10.168035 | 1.067340 | 0.338632 | C | 6.960679 | -2.190108 | 2.539601 |
| N | 5.327163 | 3.426219 | -0.182374 | H | 6.823735 | -2.773690 | 3.452684 |
| C | 6.507271 | 3.989100 | 0.373314 | H | 7.982280 | -1.797346 | 2.529070 |
| C | 7.715937 | 3.241537 | 0.429381 | H | 6.288377 | -1.326252 | 2.578648 |
| C | 2.963757 | 3.888534 | -0.768328 | C | 5.400886 | -6.508926 | 0.432165 |
| C | 4.333007 | 4.275740 | -0.764858 | H | 4.409155 | -6.498463 | 0.897424 |
| C | -7.715924 | 3.241540 | -0.429409 | H | 5.309031 | -7.005502 | -0.537216 |
| C | -6.507258 | 3.989103 | -0.373323 | H | 6.050873 | -7.121411 | 1.065928 |
| N | -5.327159 | 3.426222 | 0.182385 | C | 1.792379 | -6.107186 | -0.562034 |
| C | -4.333010 | 4.275741 | 0.764883 | H | 2.601569 | -6.555264 | -1.148501 |
| C | -2.963761 | 3.888533 | 0.768371 | H | 1.782587 | -6.590697 | 0.418432 |
| C | 6.439334 | 5.270548 | 0.954722 | H | 0.851250 | -6.353417 | -1.065311 |
| C | 7.561504 | 5.839966 | 1.535288 | C | 2.306238 | -1.945142 | 2.279097 |
| C | 8.773607 | 5.139490 | 1.569226 | H | 1.493180 | -1.224574 | 2.415380 |
| C | 8.828638 | 3.859649 | 1.038469 | H | 2.253663 | -2.682257 | 3.083446 |
| C | 2.052345 | 4.791598 | -1.361831 | H | 3.246197 | -1.392272 | 2.377454 |
| C | 2.454644 | 5.988094 | -1.937663 | C | -2.210875 | -1.570818 | 2.744784 |
| C | 3.814976 | 6.313333 | -1.973262 | H | -3.144670 | -1.001007 | 2.792572 |
| C | 4.747976 | 5.455515 | -1.402693 | H | -2.130664 | -2.179113 | 3.648443 |
| C | -4.747986 | 5.455514 | 1.402716 | H | -1.394033 | -0.841608 | 2.743930 |
| C | -3.814993 | 6.313331 | 1.973299 | C | -6.706837 | -2.579983 | 2.480132 |
| C | -2.454660 | 5.988090 | 1.937716 | H | -7.708299 | -2.162348 | 2.622294 |
| C | -2.052356 | 4.791595 | 1.361887 | H | -6.518760 | -3.307749 | 3.272637 |
| C | -8.828615 | 3.859652 | -1.038513 | H | -5.995968 | -1.754693 | 2.596392 |
| C | -8.773576 | 5.139493 | -1.569271 | C | -5.400847 | -6.508930 | -0.431968 |
| C | -7.561473 | 5.839967 | -1.535317 | H | -5.308683 | -7.005351 | 0.537463 |
| C | -6.439312 | 5.270550 | -0.954733 | H | -6.051021 | -7.121531 | -1.065429 |
| H | 12.199568 | 0.404697 | -0.601203 | H | -4.409263 | -6.498522 | -0.897541 |
| H | 11.583600 | -2.010211 | -0.483348 | C | -6.960583 | -2.190174 | -2.539573 |
| H | 9.231433 | -2.680849 | -0.233859 | H | -7.982181 | -1.797406 | -2.529082 |
| H | 10.435199 | 2.116481 | -0.402208 | H | -6.288274 | -1.326323 | -2.578627 |
| H | 4.602447 | -1.795205 | -0.097751 | H | -6.823617 | -2.773783 | -3.452635 |
| H | 0.000005 | -1.416643 | 0.000031 | C | -2.306242 | -1.945034 | -2.279127 |
| H | 0.000001 | 3.510149 | 0.000038 | H | -2.253666 | -2.682113 | -3.083508 |
| H | -4.602445 | -1.795203 | 0.097773 | H | -3.246197 | -1.392154 | -2.377465 |
| H | -9.231436 | -2.680844 | 0.233812 | H | -1.493179 | -1.224465 | -2.415372 |
| H | -11.583608 | -2.010203 | 0.483242 | C | 2.210828 | -1.570698 | -2.744795 |
| H | -12.199578 | 0.404706 | 0.601072 | H | 1.393973 | -0.841502 | -2.743911 |
| H | -10.435203 | 2.116488 | 0.402111 | H | 3.144613 | -1.000868 | -2.792554 |
| H | 5.497816 | 5.803587 | 0.971475 | H | 2.130631 | -2.178954 | -3.648482 |
| H | 7.483080 | 6.823005 | 1.989478 | C | 6.706771 | -2.580059 | -2.480086 |
| H | 9.649066 | 5.580096 | 2.035941 | H | 5.995876 | -1.754792 | -2.596358 |
| H | 9.747061 | 3.291656 | 1.132324 | H | 7.708219 | -2.162400 | -2.622281 |
| H | 1.006258 | 4.513065 | -1.408497 | H | 6.518698 | -3.307855 | -3.272564 |
| H | 1.721693 | 6.651707 | -2.386699 | H | -2.024590 | -4.601950 | -1.709711 |
| H | 4.153247 | 7.221209 | -2.462776 | C | -1.792429 | -6.107209 | 0.561817 |
| H | 5.802394 | 5.693825 | -1.463203 | H | -1.782770 | -6.590690 | -0.418664 |
| H | -5.802404 | 5.693826 | 1.463213 | H | -0.851233 | -6.353461 | 1.064960 |
| H | -4.153268 | 7.221206 | 2.462810 | H | -2.601543 | -6.555297 | 1.148380 |

**Supplementary Table 18.** Cartesian coordinates of **QB-I-2** at the optimized S0 geometry.

| C | 11.140221 | 0.177007 | -0.332634 |  | H | -1.951906 | 6.608978 | 2.635288 |
| --- | --- | --- | --- | --- | --- | --- | --- | --- |
| C | 10.800399 | -1.180818 | -0.305003 | H | -1.167497 | 4.436335 | 1.780068 |
| C | 9.471784 | -1.576825 | -0.284507 | H | -9.529994 | 3.277754 | -1.838361 |
| C | 8.444450 | -0.611378 | -0.300330 | H | -9.316863 | 5.548413 | -2.769443 |
| C | 8.760094 | 0.773739 | -0.386034 | H | -7.167868 | 6.787544 | -2.484544 |
| C | 10.126675 | 1.122764 | -0.374386 | H | -5.322123 | 5.783659 | -1.222631 |
| N | 7.113454 | -1.045547 | -0.221998 | C | 6.814563 | -2.455944 | -0.233513 |
| C | 6.023970 | -0.185433 | -0.104024 | C | 6.520934 | -3.066523 | -1.461544 |
| C | 6.226304 | 1.216473 | -0.184199 | C | 6.696559 | -3.141917 | 0.980910 |
| B | 7.594710 | 1.778194 | -0.460628 | C | 6.088989 | -4.392944 | -1.449981 |
| C | 4.747291 | -0.728456 | 0.075648 | C | 6.258538 | -4.469571 | 0.946639 |
| C | 3.654771 | 0.127299 | 0.219568 | C | 5.939898 | -5.105679 | -0.254843 |
| C | 3.803244 | 1.538677 | 0.226047 | H | 5.844436 | -4.874895 | -2.393356 |
| C | 5.099769 | 2.053464 | 0.002150 | H | 6.145038 | -5.009529 | 1.882861 |
| N | 2.386859 | -0.427606 | 0.370247 | C | 2.279084 | -1.863107 | 0.467689 |
| C | 1.210253 | 0.329544 | 0.415595 | C | 2.330260 | -2.451285 | 1.739636 |
| C | 1.240490 | 1.755550 | 0.448800 | C | 2.120578 | -2.627858 | -0.693956 |
| B | 2.616983 | 2.440889 | 0.465551 | C | 2.208599 | -3.837926 | 1.829196 |
| C | -0.002320 | -0.361581 | 0.404362 | C | 1.998580 | -4.014425 | -0.558134 |
| C | -1.218117 | 0.324371 | 0.395105 | C | 2.034821 | -4.634429 | 0.692238 |
| C | -1.254487 | 1.749510 | 0.447721 | H | 2.245251 | -4.306923 | 2.809340 |
| C | -0.008563 | 2.396713 | 0.448265 | H | 1.868372 | -4.619540 | -1.451420 |
| N | -2.390272 | -0.436767 | 0.305231 | C | -2.256897 | -1.865471 | 0.150762 |
| C | -3.663341 | 0.116305 | 0.192899 | C | -2.256127 | -2.681640 | 1.285973 |
| C | -3.818049 | 1.526105 | 0.231412 | C | -2.111949 | -2.393436 | -1.141767 |
| B | -2.633464 | 2.429429 | 0.474443 | C | -2.091844 | -4.059686 | 1.107558 |
| C | -4.754135 | -0.741476 | 0.047367 | C | -1.951151 | -3.771976 | -1.274085 |
| C | -6.034074 | -0.200566 | -0.115740 | C | -1.931685 | -4.619740 | -0.160904 |
| C | -6.240648 | 1.201465 | -0.181591 | H | -2.082762 | -4.705068 | 1.981967 |
| C | -5.116960 | 2.039498 | 0.017177 | C | -6.826484 | -2.472429 | -0.162598 |
| N | -7.122612 | -1.062754 | -0.228137 | C | -6.754729 | -3.093608 | 1.093599 |
| C | -8.454405 | -0.631126 | -0.309960 | C | -6.488597 | -3.146256 | -1.341273 |
| C | -8.773183 | 0.753515 | -0.391095 | C | -6.322012 | -4.418611 | 1.147009 |
| B | -7.610565 | 1.762299 | -0.452467 | C | -6.056690 | -4.472711 | -1.241490 |
| C | -9.479497 | -1.599164 | -0.303419 | C | -5.956295 | -5.119242 | -0.008145 |
| C | -10.809038 | -1.206620 | -0.327684 | H | -6.248454 | -4.908999 | 2.114525 |
| C | -11.152223 | 0.150399 | -0.350300 | H | -5.775084 | -5.003412 | -2.147047 |
| C | -10.140832 | 1.098727 | -0.383728 | C | 6.980083 | -2.440565 | 2.282831 |
| N | 5.278741 | 3.441992 | -0.035412 | H | 6.903664 | -3.133221 | 3.124030 |
| C | 6.382954 | 3.994379 | -0.746039 | H | 7.981035 | -1.998346 | 2.286401 |
| C | 7.581201 | 3.253713 | -0.917013 | H | 6.267667 | -1.624149 | 2.444086 |
| C | 3.007344 | 3.888877 | 0.835258 | C | 5.435006 | -6.526489 | -0.274584 |
| C | 4.351754 | 4.294050 | 0.631380 | H | 5.331487 | -6.927328 | 0.736949 |
| C | -7.600722 | 3.243621 | -0.890258 | H | 4.455865 | -6.585929 | -0.761181 |
| C | -6.405266 | 3.986027 | -0.707226 | H | 6.113611 | -7.184457 | -0.828867 |
| N | -5.300235 | 3.427798 | -0.002638 | C | 1.871784 | -6.127433 | 0.829177 |
| C | -4.373510 | 4.274320 | 0.671445 | H | 1.883433 | -6.622571 | -0.145509 |
| C | -3.026728 | 3.871683 | 0.863358 | H | 2.672012 | -6.561902 | 1.436860 |
| C | 6.236061 | 5.252087 | -1.360135 | H | 0.921993 | -6.375076 | 1.316375 |
| C | 7.279140 | 5.807051 | -2.085757 | C | 2.510704 | -1.592766 | 2.963228 |
| C | 8.483471 | 5.111978 | -2.240120 | H | 3.442938 | -1.021178 | 2.906571 |
| C | 8.609430 | 3.851684 | -1.676510 | H | 1.696727 | -0.866275 | 3.056413 |
| C | 2.166161 | 4.772022 | 1.544806 | H | 2.534294 | -2.202849 | 3.868988 |
| C | 2.605590 | 5.993163 | 2.031119 | C | -2.419361 | -2.075608 | 2.654206 |
| C | 3.945341 | 6.352891 | 1.848607 | H | -3.362530 | -1.524311 | 2.727184 |
| C | 4.812359 | 5.510102 | 1.170026 | H | -2.409007 | -2.846820 | 3.427732 |
| C | -4.836429 | 5.481193 | 1.228262 | H | -1.614423 | -1.363694 | 2.864907 |
| C | -3.969426 | 6.318333 | 1.913832 | C | -7.090299 | -2.322885 | 2.342961 |
| C | -2.627484 | 5.961246 | 2.085399 | H | -8.105706 | -1.916895 | 2.298485 |
| C | -2.185572 | 4.748401 | 1.580868 | H | -7.010348 | -2.959305 | 3.227136 |
| C | -8.629135 | 3.848243 | -1.644330 | H | -6.410771 | -1.472958 | 2.467553 |
| C | -8.506357 | 5.116263 | -2.190964 | C | -5.450320 | -6.536310 | 0.091476 |
| C | -7.304883 | 5.813462 | -2.024569 | H | -4.540184 | -6.582369 | 0.698929 |
| C | -6.261486 | 5.252382 | -1.304245 | H | -6.189382 | -7.192989 | 0.563432 |
| H | 12.181409 | 0.483046 | -0.321081 | H | -5.216795 | -6.947435 | -0.894031 |
| H | 11.578692 | -1.938083 | -0.284070 | C | -6.538993 | -2.431544 | -2.665638 |
| H | 9.220401 | -2.629354 | -0.241626 | H | -6.316230 | -3.115367 | -3.487828 |
| H | 10.388261 | 2.175315 | -0.376631 | H | -7.523452 | -1.986719 | -2.839976 |
| H | 4.602222 | -1.794773 | 0.102917 | H | -5.809976 | -1.614154 | -2.691704 |
| H | 0.001382 | -1.438206 | 0.367798 | C | -2.127806 | -1.483721 | -2.341067 |
| H | -0.011587 | 3.478768 | 0.404023 | H | -1.974857 | -2.049992 | -3.262475 |
| H | -4.604501 | -1.807470 | 0.058465 | H | -3.082575 | -0.952709 | -2.415703 |
| H | -9.225778 | -2.651305 | -0.265859 | H | -1.344239 | -0.722683 | -2.268260 |
| H | -11.585352 | -1.966089 | -0.314654 | C | 2.079905 | -1.962946 | -2.043619 |
| H | -12.194184 | 0.453873 | -0.341489 | H | 1.264537 | -1.234471 | -2.097058 |
| H | -10.405350 | 2.150463 | -0.381437 | H | 3.010602 | -1.420060 | -2.238810 |
| H | 5.294707 | 5.781176 | -1.287310 | H | 1.936577 | -2.699421 | -2.837448 |
| H | 7.139793 | 6.774393 | -2.559062 | C | 6.627117 | -2.281098 | -2.741988 |
| H | 9.293789 | 5.539393 | -2.822373 | H | 5.925632 | -1.439737 | -2.740472 |
| H | 9.512757 | 3.281632 | -1.860429 | H | 7.629343 | -1.859453 | -2.866933 |
| H | 1.149987 | 4.459242 | 1.752253 | H | 6.405970 | -2.911149 | -3.606473 |
| H | 1.929940 | 6.645705 | 2.575191 | H | -1.832783 | -4.194202 | -2.268910 |
| H | 4.325036 | 7.281963 | 2.263130 | C | -1.725770 | -6.102574 | -0.341998 |
| H | 5.855898 | 5.781117 | 1.075026 | H | -0.736847 | -6.311658 | -0.764267 |
| H | -5.881471 | 5.749237 | 1.141275 | H | -1.801284 | -6.636662 | 0.609001 |
| H | -4.350584 | 7.240429 | 2.342346 | H | -2.467743 | -6.527158 | -1.026156 |

**Supplementary Table 19.** Cartesian coordinates of **QB-I-2** at the optimized S1 geometry.

| C | 11.154603 | 0.121138 | -0.235705 |  | H | -1.953840 | 6.685099 | 2.483848 |
| --- | --- | --- | --- | --- | --- | --- | --- | --- |
| C | 10.805390 | -1.235639 | -0.220866 | H | -1.147927 | 4.531100 | 1.611990 |
| C | 9.475240 | -1.623236 | -0.221233 | H | -9.583213 | 3.252419 | -1.780767 |
| C | 8.452636 | -0.649671 | -0.244554 | H | -9.391956 | 5.524423 | -2.709366 |
| C | 8.779948 | 0.737301 | -0.320952 | H | -7.244550 | 6.774338 | -2.455036 |
| C | 10.148512 | 1.075037 | -0.286959 | H | -5.376843 | 5.777711 | -1.216276 |
| N | 7.123318 | -1.072787 | -0.185339 | C | 6.807152 | -2.478995 | -0.213428 |
| C | 6.038192 | -0.197262 | -0.080616 | C | 6.519309 | -3.073519 | -1.450972 |
| C | 6.249002 | 1.199611 | -0.157802 | C | 6.664851 | -3.174079 | 0.993352 |
| B | 7.624959 | 1.753235 | -0.415325 | C | 6.068109 | -4.393493 | -1.456639 |
| C | 4.750519 | -0.725573 | 0.082310 | C | 6.207755 | -4.494777 | 0.941103 |
| C | 3.660507 | 0.142831 | 0.206474 | C | 5.894213 | -5.114930 | -0.270041 |
| C | 3.815127 | 1.547700 | 0.210966 | H | 5.828168 | -4.863210 | -2.407307 |
| C | 5.122698 | 2.045165 | 0.009567 | H | 6.075040 | -5.041573 | 1.870761 |
| N | 2.382166 | -0.403356 | 0.333478 | C | 2.266021 | -1.838443 | 0.438819 |
| C | 1.213350 | 0.355932 | 0.359136 | C | 2.299428 | -2.417425 | 1.715630 |
| C | 1.248543 | 1.789993 | 0.369302 | C | 2.113883 | -2.609124 | -0.719497 |
| B | 2.625100 | 2.465474 | 0.407074 | C | 2.170030 | -3.802924 | 1.812541 |
| C | -0.002366 | -0.334736 | 0.361555 | C | 1.984348 | -3.994270 | -0.575672 |
| C | -1.219763 | 0.352360 | 0.338528 | C | 2.004709 | -4.606116 | 0.679057 |
| C | -1.259902 | 1.785837 | 0.368284 | H | 2.192721 | -4.265370 | 2.796205 |
| C | -0.006632 | 2.434445 | 0.347436 | H | 1.859597 | -4.604479 | -1.466277 |
| N | -2.385121 | -0.410349 | 0.261315 | C | -2.247111 | -1.838336 | 0.097026 |
| C | -3.667189 | 0.134993 | 0.173413 | C | -2.228784 | -2.662096 | 1.226639 |
| C | -3.826484 | 1.538463 | 0.208628 | C | -2.114693 | -2.355144 | -1.201158 |
| B | -2.637866 | 2.457351 | 0.410396 | C | -2.063546 | -4.038389 | 1.035437 |
| C | -4.757022 | -0.734895 | 0.055288 | C | -1.952753 | -3.732426 | -1.345555 |
| C | -6.047467 | -0.208241 | -0.091851 | C | -1.918144 | -4.588499 | -0.239168 |
| C | -6.260305 | 1.188613 | -0.162289 | H | -2.041034 | -4.690055 | 1.904922 |
| C | -5.135817 | 2.034544 | 0.015193 | C | -6.821012 | -2.491112 | -0.115151 |
| N | -7.132446 | -1.085172 | -0.187359 | C | -6.739351 | -3.103815 | 1.144798 |
| C | -8.461479 | -0.663083 | -0.258744 | C | -6.476305 | -3.166969 | -1.291001 |
| C | -8.789722 | 0.723436 | -0.341170 | C | -6.289977 | -4.423033 | 1.204534 |
| B | -7.635916 | 1.741913 | -0.422548 | C | -6.027128 | -4.487111 | -1.184059 |
| C | -9.483497 | -1.637686 | -0.242049 | C | -5.916744 | -5.125329 | 0.052777 |
| C | -10.813923 | -1.251793 | -0.253515 | H | -6.209118 | -4.907161 | 2.174578 |
| C | -11.164563 | 0.104604 | -0.274004 | H | -5.740093 | -5.019216 | -2.087023 |
| C | -10.159124 | 1.059301 | -0.319297 | C | 6.945051 | -2.490001 | 2.305285 |
| N | 5.310678 | 3.430682 | -0.029785 | H | 6.840037 | -3.187644 | 3.139160 |
| C | 6.429127 | 3.977303 | -0.714227 | H | 7.956139 | -2.071896 | 2.327413 |
| C | 7.627531 | 3.227408 | -0.869394 | H | 6.250647 | -1.657880 | 2.464398 |
| C | 3.016026 | 3.909179 | 0.773814 | C | 5.367648 | -6.527316 | -0.309409 |
| C | 4.377132 | 4.296057 | 0.625089 | H | 5.256534 | -6.940237 | 0.696383 |
| C | -7.638210 | 3.219878 | -0.865297 | H | 4.388188 | -6.564489 | -0.797598 |
| C | -6.442210 | 3.970957 | -0.696471 | H | 6.036519 | -7.187868 | -0.872237 |
| N | -5.326094 | 3.419988 | -0.012413 | C | 1.832184 | -6.097188 | 0.824620 |
| C | -4.393950 | 4.281060 | 0.650655 | H | 1.849577 | -6.599274 | -0.146347 |
| C | -3.031602 | 3.896269 | 0.792754 | H | 2.624335 | -6.531963 | 1.442601 |
| C | 6.301744 | 5.242604 | -1.320485 | H | 0.876613 | -6.335863 | 1.304879 |
| C | 7.359790 | 5.794613 | -2.024990 | C | 2.463648 | -1.551070 | 2.935937 |
| C | 8.563508 | 5.092029 | -2.160478 | H | 3.395503 | -0.978045 | 2.889378 |
| C | 8.673081 | 3.827145 | -1.603018 | H | 1.647708 | -0.824869 | 3.012143 |
| C | 2.166164 | 4.826944 | 1.431955 | H | 2.474839 | -2.155454 | 3.845704 |
| C | 2.619400 | 6.037972 | 1.934435 | C | -2.369808 | -2.066097 | 2.601693 |
| C | 3.975330 | 6.364659 | 1.825456 | H | -3.311090 | -1.514869 | 2.696109 |
| C | 4.849684 | 5.492359 | 1.187393 | H | -2.345786 | -2.842959 | 3.369190 |
| C | -4.869295 | 5.469836 | 1.225828 | H | -1.560939 | -1.355777 | 2.802330 |
| C | -3.996355 | 6.338154 | 1.871623 | C | -7.085855 | -2.331822 | 2.390506 |
| C | -2.639467 | 6.013841 | 1.975182 | H | -8.113861 | -1.957854 | 2.352537 |
| C | -2.183334 | 4.809439 | 1.459282 | H | -6.978341 | -2.957474 | 3.279339 |
| C | -8.680344 | 3.824175 | -1.599960 | H | -6.432625 | -1.459871 | 2.501871 |
| C | -8.570490 | 5.094590 | -2.144738 | C | -5.389673 | -6.533990 | 0.159952 |
| C | -7.369609 | 5.798994 | -1.994741 | H | -4.460060 | -6.557426 | 0.738638 |
| C | -6.314517 | 5.242717 | -1.289324 | H | -6.104540 | -7.191373 | 0.666549 |
| H | 12.197667 | 0.419535 | -0.208370 | H | -5.181348 | -6.959005 | -0.825247 |
| H | 11.578919 | -1.997538 | -0.193836 | C | -6.539194 | -2.461734 | -2.619982 |
| H | 9.215455 | -2.674087 | -0.188292 | H | -6.311494 | -3.148730 | -3.438072 |
| H | 10.418071 | 2.125486 | -0.281389 | H | -7.529273 | -2.029473 | -2.794025 |
| H | 4.594012 | -1.790991 | 0.110605 | H | -5.819888 | -1.636144 | -2.655152 |
| H | 0.000106 | -1.411253 | 0.352952 | C | -2.140338 | -1.435233 | -2.392465 |
| H | -0.008838 | 3.513921 | 0.275569 | H | -2.007086 | -1.995178 | -3.320744 |
| H | -4.597247 | -1.800057 | 0.073112 | H | -3.089471 | -0.892092 | -2.449183 |
| H | -9.223021 | -2.688233 | -0.206361 | H | -1.347440 | -0.683510 | -2.323881 |
| H | -11.586708 | -2.014624 | -0.232448 | C | 2.082367 | -1.951720 | -2.072993 |
| H | -12.208102 | 0.401975 | -0.255520 | H | 1.260069 | -1.231849 | -2.136846 |
| H | -10.430179 | 2.109273 | -0.317020 | H | 3.008857 | -1.399843 | -2.262647 |
| H | 5.362345 | 5.776002 | -1.258171 | H | 1.954117 | -2.693585 | -2.864360 |
| H | 7.235081 | 6.765034 | -2.495678 | C | 6.654895 | -2.279156 | -2.723160 |
| H | 9.387417 | 5.518685 | -2.723972 | H | 5.972696 | -1.422145 | -2.721546 |
| H | 9.578397 | 3.255595 | -1.772276 | H | 7.667489 | -1.878968 | -2.834748 |
| H | 1.131766 | 4.547489 | 1.589010 | H | 6.428629 | -2.896653 | -3.595265 |
| H | 1.932677 | 6.712590 | 2.437111 | H | -1.844677 | -4.146713 | -2.344886 |
| H | 4.357918 | 7.285239 | 2.254896 | C | -1.710476 | -6.069299 | -0.434162 |
| H | 5.904104 | 5.732827 | 1.136460 | H | -0.725351 | -6.272290 | -0.868151 |
| H | -5.924523 | 5.707703 | 1.178371 | H | -1.774535 | -6.611244 | 0.513165 |
| H | -4.380676 | 7.253368 | 2.310835 | H | -2.458317 | -6.490515 | -1.114014 |

**References**

1. Dolomanov, O. V., Bourhis, L. J., Gildea, R. J., Howard, J. A. & Puschmann, H. OLEX2: a complete structure solution, refinement and analysis program. *J. Appl. Cryst.* **42**, 339-341 (2009).
2. Sheldrick, G. M. SHELXT-integrated space-group and crystal-structure determination. *Acta Cryst.* **A71**, 3-8 (2015).
3. Sheldrick, G. M. Crystal structure refinement with SHELXL. *Acta Cryst.***C71**, 3-8 (2015).
4. Neese, F. Software update: the ORCA 5.0 program system, version 4.0, *WIREs Comput. Mol. Sci.*, **12**, e1606 (2022).
5. Kaji, H. *et al.* Purely organic electroluminescent material realizing 100% conversion from electricity to light. *Nat. Commun.* **6**, 8476 (2015)
6. Zhang, Q. *et al.* Efficient blue organic light-emitting diodes employing thermally activated delayed fluorescence. *Nat. Photonics* **8**, 326-332 (2014).
7. Wu, T.-L. *et al.* Diboron compound-based organic light-emitting diodes with high efficiency and reduced efficiency roll-off. *Nat. Photonics* 12, 235-240 (2018).
8. Wu, S.-F. *et al.* White organic LED with a luminous efficacy exceeding 100 lm w-1 without light out-coupling enhancement techniques. *Adv. Funct. Mater.* 27, 1701314 (2017).
9. Reineke, S., Walzer, K., Leo, K. Triplet-exciton quenching in organic phosphorescent light-emitting diodes with Ir-based emitters. *Phys. Rev. B* 75, 125328 (2007).
10. Zhang, Q. *et al.* Integrating TADF luminogens with AIE characteristics using a novel acridine-carbazole hybrid as donor for high-performance and low efficiency roll-off OLEDs. *J. Mater. Chem. C* **7**, 9487-9495 (2019).
